# Supplementary material for: Obtaining EQ-5D-5L utilities from the disease specific quality of life Alzheimer’s disease scale: development and results from a mapping study
Source: Springer Nature journal article supplement (doi:10.1007/s11136-020-02670-8), 2020-10-17
Supplement: MOESM1 [file 18496610]

## **Supplemental material for:**

### **Title**

Obtaining EQ-5D-5L utilities from the disease specific Quality of Life Alzheimer's Disease Scale: Development and results from a mapping study – Supplemental material

### **Journal**

Quality of Life Research

### **Authors**

Ines Rombach\*, Marvi Iftikhar\*, Gurleen S. Jhuti, Anders Gustavsson, Pascal Lecomte, Mark Belger, Ron Handels, Amparo Y. Castro Sanchez, Jan Kors, Louise Hopper, Marcel Olde Rikkert, Geir Selbæk, Astrid Stephan, Sietske A.M. Sikkes, Bob Woods, Manuel Gonçalves-Pereira, Orazio Zanetti, Inez H.G.B. Ramakers, Frans R.J. Verhey, John Gallacher, Actifcare Consortium, LeARN Consortium, Filipa Landeiro\*, Alastair M. Gray\* on behalf on the ROADMAP Consortium

\*Equal contribution as joint first and joint senior authors, respectively

### **Corresponding Author**

Ines Rombach, Health Economics Research Centre, Nuffield Department of Population Health, University of Oxford, Oxford, United Kingdom

E-mail: [ines.rombach@ndorms.ox.ac.uk](mailto:ines.rombach@ndorms.ox.ac.uk)

## Table of Contents

|                                                                                                                                                                    |    |
|--------------------------------------------------------------------------------------------------------------------------------------------------------------------|----|
| Supplemental Table 1: Overview of the data used (continued from main text) .....                                                                                   | 3  |
| Supplemental Table 2: Item responses to the EQ-5D-5L and QoL-AD .....                                                                                              | 4  |
| Supplemental Table 3: Characteristics of participants whose observations were included in and excluded from mapping study .....                                    | 7  |
| Supplemental Figure 1: Scatter plots of observed QoL-AD vs. observed EQ-5D utilities .....                                                                         | 8  |
| Supplemental Table 4: Correlations between the QoL-AD and EQ-5D-5L (EQ-5D-3L for the validation dataset) .....                                                     | 9  |
| Supplemental Table 5a: Comparison of the main mapping algorithms (all scenarios) .....                                                                             | 11 |
| Supplemental Table 5b: Comparison of the mapping algorithms (excluding QoL-AD question 7, not including age and sex) .....                                         | 12 |
| Supplemental Table 5c: Comparison of the mapping algorithms (including QoL-AD item 7, age and sex) .....                                                           | 13 |
| Supplemental Table 5d: Comparison of the mapping algorithms when the model selection is run in the validation dataset (excluding QoL-AD item 7, age and sex) ..... | 14 |
| Supplemental Figure 2a: Prediction accuracy of the mapping models using mlogit (continued from main manuscript) .....                                              | 15 |
| Supplemental Figure 2b: Prediction accuracy of the mapping models using Tobit .....                                                                                | 16 |
| Supplemental Figure 2c: Prediction accuracy of the mapping models using Tobit .....                                                                                | 17 |
| Supplemental Table 6: Assessment of preferred mlogit model across different centiles of QoL-AD scores .....                                                        | 18 |
| Supplemental Figure 3: Probability of predicting each response level for a given observed response to the EQ-5D-5L items .....                                     | 19 |
| Supplemental Table 7: Mean and range of predicted EQ-5D utilities for observed QoL-AD scores ...                                                                   | 31 |
| Supplemental Figure 4: Range of predicted EQ-5D utilities for observed QoL-AD scores .....                                                                         | 32 |
| Instructions for the Stata ado-file to map the QoL-AD to the EQ-5D-5L .....                                                                                        | 33 |

**Supplemental Table 1: Overview of the data used (continued from main text)**

| Demographic Variable                                                                   | Estimation datasets                   |                                       | Validation dataset                    |
|----------------------------------------------------------------------------------------|---------------------------------------|---------------------------------------|---------------------------------------|
|                                                                                        | Proxy-rated QoL-AD → Self-rated EQ-5D | Self-rated QoL-AD → Proxy-rated EQ-5D | Proxy-rated QoL-AD → Self-rated EQ-5D |
| Total number of observations in datasets                                               | 1,353                                 | 1,353                                 | 753                                   |
| Total number of observations excluded from analysis*                                   | 334 (25%)                             | 336 (25%)                             | 366 (49%)                             |
| Total number of observations included in analysis                                      | 1,019 (75%)                           | 1,017 (75%)                           | 387 (51%)                             |
| <i>Total number of observations excluded if QoL-AD item 7 was included in analysis</i> | <i>149/1,019(15%)</i>                 | <i>139/1,017 (14%)</i>                | <i>46/387 (12%)</i>                   |
| Number of participants included in analysis                                            | 429                                   | 427                                   | 204                                   |
| PwD Age (SD)                                                                           | 78 (8)                                | 78 (8)                                | 67 (9)                                |
| Proxy Age (SD)                                                                         | 66 (13)                               | 66 (13)                               | 62 (11)                               |
| PwD Sex (Female)                                                                       | 55%                                   | 55%                                   | 32%                                   |
| Proxy Sex (Female)                                                                     | 67%                                   | 67%                                   | 76%                                   |
| MMSE**                                                                                 | 19 (5)                                | 19 (5)                                | 26 (4)                                |
| CDR 0***                                                                               | <1%                                   | 0%                                    | 12%                                   |
| CDR 0.5***                                                                             | 3%                                    | 3%                                    | 54%                                   |
| CDR 1***                                                                               | 70%                                   | 69%                                   | 30%                                   |
| CDR 2***                                                                               | 26%                                   | 26%                                   | 4%                                    |
| CDR 3***                                                                               | 1%                                    | 1%                                    | 0%                                    |
| Self-rated QoL-AD mean (SD)                                                            | n/a                                   | 35 (6)                                | n/a                                   |
| Self-rated QoL-AD median (range)                                                       | n/a                                   | 36 (16, 52)                           | n/a                                   |
| Proxy-rated QoL-AD mean (SD)                                                           | 30 (6)                                | n/a                                   | 32 (5)                                |
| Proxy-rated QoL-AD median (range)                                                      | 30 (15, 50)                           | n/a                                   | 31 (15, 51)                           |
| Self-rated EQ-5D Utility mean (SD)                                                     | 0.77 (0.21)                           | n/a                                   | 0.83 (0.20)                           |
| Self-rated EQ-5D Utility median (range)                                                | 0.81 (-0.26, 1)                       | n/a                                   | 0.85 (-0.04, 1)                       |
| Proxy-rated EQ-5D Utility mean (SD)                                                    | n/a                                   | 0.62 (0.23)                           | n/a                                   |
| Proxy-rated EQ-5D Utility median (range)                                               | n/a                                   | 0.65 (-0.31, 1)                       | n/a                                   |
| Spearman's Correlation (95% CI)                                                        | 0.32 (0.27, 0.38)                     | 0.24 (0.18, 0.30)                     | 0.21 (0.11, 0.30)                     |

\*Insufficient EQ-5D-5L or QoL-AD data were available for inclusion in the mapping study, either through unavailability of the complete questionnaire, or individual items.

\*\*MMSE (Mini-mental state examination) data were unavailable for a proportion of people with dementia. the following percentage of the total number of observations are excluded from the MMSE summaries: Estimation dataset: 8% in both the 'Self-rated QoL-AD → Self-rated EQ-5D' scenario and the 'Proxy-rated QoL-AD → Proxy-rated EQ-5D' scenario; Validation dataset: 1%. The score ranges from 0 to 30, with higher scores indicating less cognitive impairment.

\*\*\*CDR (clinical dementia rating) data were unavailable for a proportion of observations; the following percentage of the total number of observations are excluded from the CRD summaries: estimation dataset: 0.5% in the 'Self-rated QoL-AD → Proxy-rated EQ-5D' scenario; 2% in the 'Proxy-rated QoL-AD → Self-rated EQ-5D' scenario ; validation dataset: 7%. Missing data occurred predominantly due to CDR assessments not being performed, rather than individual domains of cognitive and functional performance being missing. The percentages presented are based on the population with available CDR data only.

Abbreviations: CI – Confidence interval; PwD – Person with dementia; SD – Standard deviation

## Supplemental Table 2: Item responses to the EQ-5D-5L and QoL-AD

Note: the datasets used are the estimation datasets presented in Table 1 in the main text.

|                                                                              | Self-rated QoL-AD<br>→<br>Self-rated EQ-5D<br>(N=1020) | Proxy-rated QoL-AD<br>→<br>Proxy-rated EQ-5D<br>(N=1099) |
|------------------------------------------------------------------------------|--------------------------------------------------------|----------------------------------------------------------|
| <b>Item responses to the EQ-5D</b>                                           |                                                        |                                                          |
| Mobility                                                                     |                                                        |                                                          |
| I have no problems in walking about                                          | 582 (57%)                                              | 441 (40%)                                                |
| I have slight problems in walking about                                      | 207 (20%)                                              | 265 (24%)                                                |
| I have moderate problems in walking about                                    | 174 (17%)                                              | 246 (22%)                                                |
| I have severe problems in walking about                                      | 50 (5%)                                                | 124 (11%)                                                |
| I am unable to walk about                                                    | 7 (1%)                                                 | 23 (2%)                                                  |
| Self-care                                                                    |                                                        |                                                          |
| I have no problems washing or dressing myself                                | 773 (76%)                                              | 494 (45%)                                                |
| I have slight problems washing or dressing myself                            | 142 (14%)                                              | 290 (26%)                                                |
| I have moderate problems washing or dressing myself                          | 68 (7%)                                                | 189 (17%)                                                |
| I have severe problems washing or dressing myself                            | 19 (2%)                                                | 67 (6%)                                                  |
| I am unable to wash or dress myself                                          | 18 (2%)                                                | 59 (5%)                                                  |
| Usual activities (e.g. work, study, housework, family or leisure activities) |                                                        |                                                          |
| I have no problems doing my usual activities                                 | 590 (58%)                                              | 233 (21%)                                                |
| I have slight problems doing my usual activities                             | 239 (23%)                                              | 279 (25%)                                                |
| I have moderate problems doing my usual activities                           | 125 (12%)                                              | 295 (27%)                                                |
| I have severe problems doing my usual activities                             | 47 (5%)                                                | 196 (18%)                                                |
| I am unable to do my usual activities                                        | 19 (2%)                                                | 96 (9%)                                                  |
| Pain/discomfort                                                              |                                                        |                                                          |
| I have no pain or discomfort                                                 | 583 (57%)                                              | 418 (38%)                                                |
| I have slight pain or discomfort                                             | 232 (23%)                                              | 328 (30%)                                                |
| I have moderate pain or discomfort                                           | 162 (16%)                                              | 285 (26%)                                                |
| I have severe pain or discomfort                                             | 36 (4%)                                                | 64 (6%)                                                  |
| I have extreme pain or discomfort                                            | 7 (1%)                                                 | 4 (0%)                                                   |
| Anxiety/depression                                                           |                                                        |                                                          |
| I am not anxious or depressed                                                | 611 (60%)                                              | 404 (37%)                                                |
| I am slightly anxious or depressed                                           | 272 (27%)                                              | 349 (32%)                                                |
| I am moderately anxious or depressed                                         | 115 (11%)                                              | 272 (25%)                                                |
| I am severely anxious or depressed                                           | 19 (2%)                                                | 64 (6%)                                                  |
| I am extremely anxious or depressed                                          | 3 (0%)                                                 | 10 (1%)                                                  |
| <b>Item response to the QoL-AD</b>                                           |                                                        |                                                          |
| 1. How do you feel about your physical health?                               |                                                        |                                                          |
| Poor                                                                         | 76 (7%)                                                | 189 (17%)                                                |
| Fair                                                                         | 307 (30%)                                              | 393 (36%)                                                |

|                                                                                               | <b>Self-rated QoL-AD<br/>→<br/>Self-rated EQ-5D<br/>(N=1020)</b> | <b>Proxy-rated QoL-AD<br/>→<br/>Proxy-rated EQ-5D<br/>(N=1099)</b> |
|-----------------------------------------------------------------------------------------------|------------------------------------------------------------------|--------------------------------------------------------------------|
| Good                                                                                          | 523 (51%)                                                        | 435 (40%)                                                          |
| Excellent                                                                                     | 114 (11%)                                                        | 82 (7%)                                                            |
| <b>2. How do you feel about your energy level?</b>                                            |                                                                  |                                                                    |
| Poor                                                                                          | 124 (12%)                                                        | 362 (33%)                                                          |
| Fair                                                                                          | 336 (33%)                                                        | 422 (38%)                                                          |
| Good                                                                                          | 466 (46%)                                                        | 274 (25%)                                                          |
| Excellent                                                                                     | 94 (9%)                                                          | 41 (4%)                                                            |
| <b>3. How has your mood been lately?</b>                                                      |                                                                  |                                                                    |
| Poor                                                                                          | 76 (7%)                                                          | 125 (11%)                                                          |
| Fair                                                                                          | 274 (27%)                                                        | 486 (44%)                                                          |
| Good                                                                                          | 595 (58%)                                                        | 439 (40%)                                                          |
| Excellent                                                                                     | 75 (7%)                                                          | 49 (4%)                                                            |
| <b>4. How about your living situation? How do you feel about the place you live now?</b>      |                                                                  |                                                                    |
| Poor                                                                                          | 15 (1%)                                                          | 68 (6%)                                                            |
| Fair                                                                                          | 115 (11%)                                                        | 168 (15%)                                                          |
| Good                                                                                          | 572 (56%)                                                        | 590 (54%)                                                          |
| Excellent                                                                                     | 318 (31%)                                                        | 273 (25%)                                                          |
| <b>5. How about your memory?</b>                                                              |                                                                  |                                                                    |
| Poor                                                                                          | 262 (26%)                                                        | 686 (62%)                                                          |
| Fair                                                                                          | 486 (48%)                                                        | 341 (31%)                                                          |
| Good                                                                                          | 257 (25%)                                                        | 64 (6%)                                                            |
| Excellent                                                                                     | 15 (1%)                                                          | 8 (1%)                                                             |
| <b>6. How about your family and your relationship with family members?</b>                    |                                                                  |                                                                    |
| Poor                                                                                          | 14 (1%)                                                          | 44 (4%)                                                            |
| Fair                                                                                          | 88 (9%)                                                          | 178 (16%)                                                          |
| Good                                                                                          | 575 (56%)                                                        | 616 (56%)                                                          |
| Excellent                                                                                     | 343 (34%)                                                        | 261 (24%)                                                          |
| <b>7. How do you feel about your marriage? How is your relationship with (spouse's name)?</b> |                                                                  |                                                                    |
| Poor                                                                                          | 18 (2%)                                                          | 39 (4%)                                                            |
| Fair                                                                                          | 64 (6%)                                                          | 150 (14%)                                                          |
| Good                                                                                          | 448 (44%)                                                        | 526 (48%)                                                          |
| Excellent                                                                                     | 353 (35%)                                                        | 228 (21%)                                                          |
| Missing data                                                                                  | 137 (13%)                                                        | 156 (14%)                                                          |
| <b>8. How would you describe your current relationship with your friends?</b>                 |                                                                  |                                                                    |
| Poor                                                                                          | 102 (10%)                                                        | 236 (21%)                                                          |
| Fair                                                                                          | 235 (23%)                                                        | 283 (26%)                                                          |
| Good                                                                                          | 548 (54%)                                                        | 487 (44%)                                                          |
| Excellent                                                                                     | 135 (13%)                                                        | 93 (8%)                                                            |

|                                                                                                                  | <b>Self-rated QoL-AD<br/>→<br/>Self-rated EQ-5D<br/>(N=1020)</b> | <b>Proxy-rated QoL-AD<br/>→<br/>Proxy-rated EQ-5D<br/>(N=1099)</b> |
|------------------------------------------------------------------------------------------------------------------|------------------------------------------------------------------|--------------------------------------------------------------------|
| 9. How do you feel about yourself - when you think of your whole self, and all the different things about you?   |                                                                  |                                                                    |
| Poor                                                                                                             | 63 (6%)                                                          | 139 (13%)                                                          |
| Fair                                                                                                             | 326 (32%)                                                        | 432 (39%)                                                          |
| Good                                                                                                             | 554 (54%)                                                        | 482 (44%)                                                          |
| Excellent                                                                                                        | 77 (8%)                                                          | 46 (4%)                                                            |
|                                                                                                                  |                                                                  |                                                                    |
| 10. How do you feel about your ability to do things like chores around the house or other things you need to do? |                                                                  |                                                                    |
| Poor                                                                                                             | 147 (14%)                                                        | 504 (46%)                                                          |
| Fair                                                                                                             | 315 (31%)                                                        | 342 (31%)                                                          |
| Good                                                                                                             | 474 (46%)                                                        | 215 (20%)                                                          |
| Excellent                                                                                                        | 84 (8%)                                                          | 38 (3%)                                                            |
|                                                                                                                  |                                                                  |                                                                    |
| 11. How about your ability to do things for fun, that you enjoy?                                                 |                                                                  |                                                                    |
| Poor                                                                                                             | 137 (13%)                                                        | 341 (31%)                                                          |
| Fair                                                                                                             | 304 (30%)                                                        | 366 (33%)                                                          |
| Good                                                                                                             | 483 (47%)                                                        | 344 (31%)                                                          |
| Excellent                                                                                                        | 96 (9%)                                                          | 48 (4%)                                                            |
|                                                                                                                  |                                                                  |                                                                    |
| 12. How do you feel about your current situation with money, your financial situ                                 |                                                                  |                                                                    |
| Poor                                                                                                             | 57 (6%)                                                          | 213 (19%)                                                          |
| Fair                                                                                                             | 220 (22%)                                                        | 258 (23%)                                                          |
| Good                                                                                                             | 626 (61%)                                                        | 495 (45%)                                                          |
| Excellent                                                                                                        | 117 (11%)                                                        | 133 (12%)                                                          |
|                                                                                                                  |                                                                  |                                                                    |
| 13. How would you describe your life as a whole?                                                                 |                                                                  |                                                                    |
| Poor                                                                                                             | 34 (3%)                                                          | 85 (8%)                                                            |
| Fair                                                                                                             | 249 (24%)                                                        | 428 (39%)                                                          |
| Good                                                                                                             | 580 (57%)                                                        | 530 (48%)                                                          |
| Excellent                                                                                                        | 157 (15%)                                                        | 56 (5%)                                                            |

**Supplemental Table 3: Characteristics of participants whose observations were included in and excluded from mapping study**

| Demographic Variable                     | Self-rated QoL-AD → Self-rated EQ-5D |                | Proxy-rated QoL-AD → Proxy-rated EQ-5D |                 | Proxy-rated QoL-AD → Self-rated EQ-5D |                 | Self-rated QoL-AD → Proxy-rated EQ-5D |                 |
|------------------------------------------|--------------------------------------|----------------|----------------------------------------|-----------------|---------------------------------------|-----------------|---------------------------------------|-----------------|
|                                          | Included                             | Excluded*      | Included                               | Excluded*       | Included                              | Excluded*       | Included                              | Excluded*       |
| Mapping study                            |                                      |                |                                        |                 |                                       |                 |                                       |                 |
| N                                        | 1,020                                | 333            | 1,099                                  | 254             | 1,019                                 | 334             | 1,017                                 | 336             |
| PwD Age (SD)                             | 78 (8)                               | 80 (8)         | 78 (8)                                 | 80 (8)          | 78 (8)                                | 80 (8)          | 78 (8)                                | 80 (8)          |
| Proxy Age (SD)                           | 66 (13)                              | 69 (14)        | 67 (13)                                | 68 (13)         | 66 (13)                               | 68 (13)         | 66 (13)                               | 68 (14)         |
| PwD Sex (Female)                         | 55%                                  | 53%            | 54%                                    | 56%             | 55%                                   | 52%             | 55%                                   | 53%             |
| Proxy Sex (Female)                       | 67%                                  | 66%            | 67%                                    | 69%             | 67%                                   | 67%             | 67%                                   | 68%             |
| MMSE                                     | 19 (5)                               | 17 (7)         | 19 (5)                                 | 17 (6)          | 19 (5)                                | 17 (7)          | 19 (5)                                | 17 (7)          |
| CDR 0                                    | 0%                                   | 1%             | 0%                                     | 1%              | <1%                                   | 0%              | 0%                                    | 1%              |
| CDR 0.5                                  | 3%                                   | 2%             | 3%                                     | 3%              | 3%                                    | 2%              | 3%                                    | 2%              |
| CDR 1                                    | 70%                                  | 46%            | 67%                                    | 60%             | 70%                                   | 46%             | 69%                                   | 48%             |
| CDR 2                                    | 26%                                  | 39%            | 28%                                    | 32%             | 26%                                   | 38%             | 26%                                   | 37%             |
| CDR 3                                    | 1%                                   | 12%            | 3%                                     | 4%              | 1%                                    | 14%             | 1%                                    | 12%             |
| Self-rated QoL-AD mean (SD)              | 35 (6)                               | 34 (10)        | n/a                                    | n/a             | n/a                                   | n/a             | 35 (6)                                | 33 (9)          |
| Self-rated QoL-AD median (range)         | 36 (16, 52)                          | 35 (13, 48)    | n/a                                    | n/a             | n/a                                   | n/a             | 36 (16, 52)                           | 36 (13, 49)     |
| Proxy-rated QoL-AD mean (SD)             | n/a                                  | n/a            | 30 (6)                                 | 32 (3)          | 30 (6)                                | 29 (5)          | n/a                                   | n/a             |
| Proxy-rated QoL-AD median (range)        | n/a                                  | n/a            | 30 (15, 50)                            | 34 (27, 36)     | 30 (15, 50)                           | 29 (18, 41)     | n/a                                   | n/a             |
| Self-rated EQ-5D Utility mean (SD)       | 0.77 (0.21)                          | 0.76 (0.20)    | n/a                                    | n/a             | 0.77 (0.21)                           | 0.73 (0.22)     | n/a                                   | n/a             |
| Self-rated EQ-5D Utility median (range)  | 0.81 (-0.26, 1)                      | 0.77 (0.02, 1) | n/a                                    | n/a             | 0.81 (-0.26, 1)                       | 0.76 (-0.15, 1) | n/a                                   | n/a             |
| Proxy-rated EQ-5D Utility mean (SD)      | n/a                                  | n/a            | 0.60 (0.24)                            | 0.53 (0.25)     | n/a                                   | n/a             | 0.62 (0.23)                           | 0.44 (0.28)     |
| Proxy-rated EQ-5D Utility median (range) | n/a                                  | n/a            | 0.64(-0.31, 1)                         | 0.59 (-0.21, 1) | n/a                                   | n/a             | 0.65 (-0.31, 1)                       | 0.50 (-0.22, 1) |

*\*participants were excluded from the mapping study if either the EQ-5D Utility, the QoL-AD or both were missing; hence the summaries for these variables only include a subset of the sample.*

*Abbreviations: CI – Confidence interval; PwD – Person with dementia; SD – Standard deviation*

# Supplemental Figure 1: Scatter plots of observed QoL-AD vs. observed EQ-5D utilities

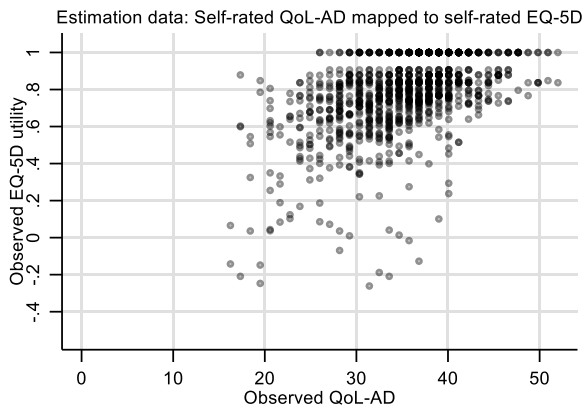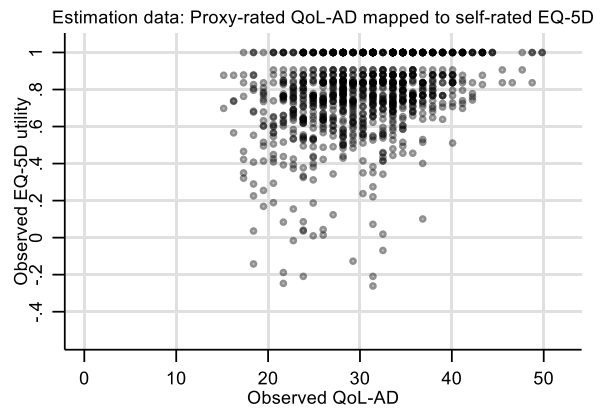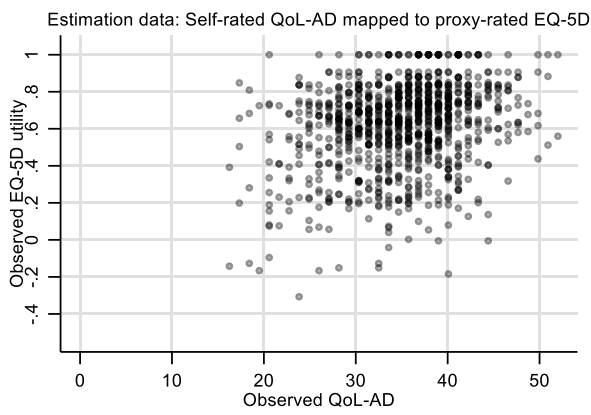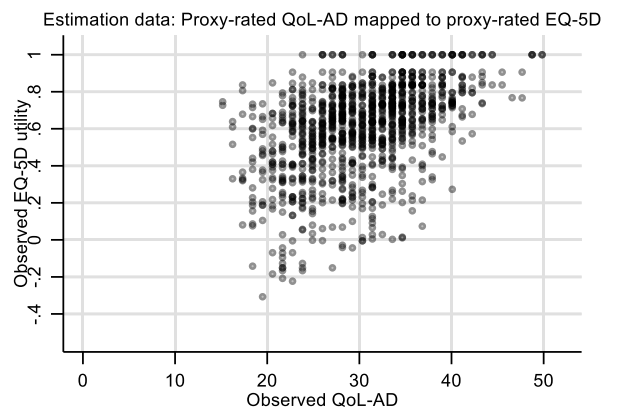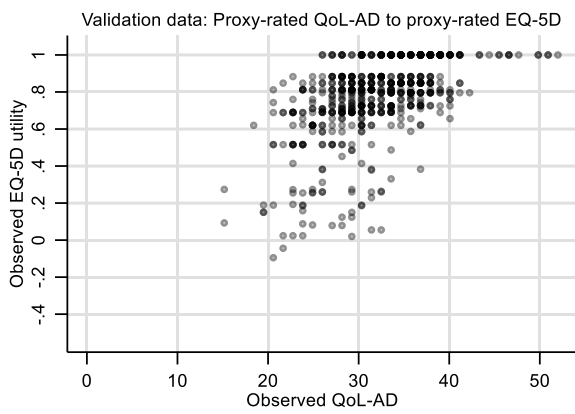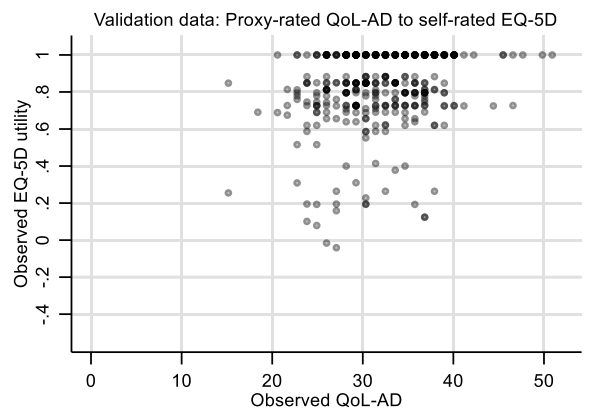



**Supplemental Table 4: Correlations between the QoL-AD and EQ-5D-5L (EQ-5D-3L for the validation dataset)**

|                                |                                          |                    | QoL-AD item 1 (Physical health) | QoL-AD item 2 (Energy levels) | QoL-AD item 3 (Mood) | QoL-AD item 4 (Living situation) | QoL-AD item 5 (Memory) | QoL-AD item 6 (Family) | QoL-AD item 7* (Marriage) | QoL-AD item 8 (Friends) | QoL-AD item 9 (Self) | QoL-AD item 10 (Chores) | QoL-AD item 11 (Fun) | QoL-AD item 12 (Money) | QoL-AD item 13 (Life as a whole) |
|--------------------------------|------------------------------------------|--------------------|---------------------------------|-------------------------------|----------------------|----------------------------------|------------------------|------------------------|---------------------------|-------------------------|----------------------|-------------------------|----------------------|------------------------|----------------------------------|
| Estimation datasets: Actifcare | Self-rated QoL-AD vs. self-rated EQ-5D   | Mobility           | -0.39                           | -0.39                         | -0.25                | -0.16                            | -0.22                  | -0.11                  | -0.15                     | -0.15                   | -0.27                | -0.38                   | -0.26                | -0.17                  | -0.21                            |
|                                |                                          | Self-care          | -0.28                           | -0.28                         | -0.15                | -0.14                            | -0.09                  | -0.15                  | -0.12                     | -0.17                   | -0.17                | -0.39                   | -0.22                | -0.19                  | -0.23                            |
|                                |                                          | Usual activities   | -0.33                           | -0.39                         | -0.25                | -0.23                            | -0.21                  | -0.15                  | -0.15                     | -0.22                   | -0.27                | -0.53                   | -0.31                | -0.17                  | -0.29                            |
|                                |                                          | Pain               | -0.33                           | -0.29                         | -0.24                | -0.18                            | -0.18                  | -0.04                  | -0.09                     | -0.02                   | -0.27                | -0.19                   | -0.18                | -0.08                  | -0.23                            |
|                                |                                          | Anxiety/depression | -0.28                           | -0.31                         | -0.44                | -0.22                            | -0.23                  | -0.12                  | -0.12                     | -0.16                   | -0.37                | -0.24                   | -0.22                | -0.15                  | -0.32                            |
|                                | Proxy-rated QoL-AD vs. Self-rated EQ-5D  | Mobility           | -0.43                           | -0.28                         | -0.15                | -0.11                            | 0.03                   | -0.02                  | -0.07                     | -0.12                   | -0.18                | -0.26                   | -0.19                | -0.06                  | -0.15                            |
|                                |                                          | Self-care          | -0.26                           | -0.18                         | -0.09                | -0.12                            | -0.03                  | -0.06                  | -0.09                     | -0.05                   | -0.15                | -0.24                   | -0.19                | -0.09                  | -0.13                            |
|                                |                                          | Usual activities   | -0.34                           | -0.23                         | -0.14                | -0.13                            | -0.05                  | -0.04                  | -0.04                     | -0.11                   | -0.22                | -0.27                   | -0.18                | -0.10                  | -0.15                            |
|                                |                                          | Pain               | -0.28                           | -0.16                         | -0.13                | -0.13                            | 0.02                   | 0.05                   | -0.07                     | -0.03                   | -0.16                | -0.06                   | -0.05                | -0.05                  | -0.11                            |
|                                |                                          | Anxiety/depression | -0.21                           | -0.12                         | -0.26                | -0.13                            | -0.03                  | -0.06                  | -0.08                     | -0.05                   | -0.24                | -0.03                   | -0.14                | -0.08                  | -0.19                            |
|                                | Self-rated QoL-AD vs. Proxy-rated EQ-5D  | Mobility           | -0.26                           | -0.31                         | -0.10                | -0.06                            | -0.06                  | -0.10                  | -0.07                     | -0.10                   | -0.15                | -0.34                   | -0.19                | -0.10                  | -0.12                            |
|                                |                                          | Self-care          | -0.16                           | -0.19                         | -0.07                | -0.07                            | 0.02                   | -0.09                  | -0.06                     | -0.12                   | -0.11                | -0.32                   | -0.19                | -0.16                  | -0.12                            |
|                                |                                          | Usual activities   | -0.11                           | -0.21                         | -0.03                | 0.02                             | 0.01                   | -0.01                  | 0.00                      | -0.03                   | -0.05                | -0.28                   | -0.14                | -0.02                  | -0.05                            |
|                                |                                          | Pain               | -0.21                           | -0.22                         | -0.14                | -0.12                            | -0.10                  | -0.04                  | -0.06                     | -0.05                   | -0.17                | -0.17                   | -0.12                | -0.08                  | -0.20                            |
|                                |                                          | Anxiety/depression | -0.14                           | -0.13                         | -0.18                | -0.09                            | -0.05                  | -0.04                  | -0.05                     | -0.07                   | -0.18                | -0.08                   | -0.14                | -0.06                  | -0.20                            |
|                                | Proxy-rated QoL-AD vs. Proxy-rated EQ-5D | Mobility           | -0.47                           | -0.35                         | -0.11                | -0.09                            | -0.04                  | -0.09                  | -0.04                     | -0.15                   | -0.12                | -0.36                   | -0.24                | -0.08                  | -0.12                            |
|                                |                                          | Self-care          | -0.25                           | -0.25                         | -0.15                | -0.17                            | -0.11                  | -0.15                  | -0.15                     | -0.19                   | -0.19                | -0.47                   | -0.29                | -0.14                  | -0.22                            |
|                                |                                          | Usual activities   | -0.30                           | -0.33                         | -0.16                | -0.05                            | -0.18                  | -0.06                  | -0.08                     | -0.19                   | -0.19                | -0.52                   | -0.26                | -0.11                  | -0.23                            |
|                                |                                          | Pain               | -0.39                           | -0.25                         | -0.21                | -0.13                            | -0.06                  | 0.02                   | -0.06                     | -0.06                   | -0.18                | -0.14                   | -0.11                | -0.08                  | -0.12                            |
|                                |                                          | Anxiety/depression | -0.20                           | -0.23                         | -0.38                | -0.14                            | -0.15                  | -0.08                  | -0.10                     | -0.14                   | -0.33                | -0.11                   | -0.21                | -0.13                  | -0.30                            |
| Validation dataset             | Proxy-rated QoL-AD vs. Self-rated EQ-5D  | Mobility           | -0.34                           | -0.26                         | -0.05                | -0.08                            | -0.04                  | 0.03                   | -0.02                     | -0.07                   | -0.08                | -0.16                   | -0.22                | -0.07                  | -0.07                            |
|                                |                                          | Self-care          | -0.16                           | -0.11                         | -0.07                | 0.00                             | 0.07                   | -0.02                  | -0.07                     | 0.00                    | -0.12                | -0.21                   | -0.16                | 0.09                   | -0.11                            |
|                                |                                          | Usual activities   | -0.24                           | -0.21                         | -0.13                | -0.03                            | -0.01                  | -0.09                  | -0.09                     | -0.09                   | -0.15                | -0.16                   | -0.23                | 0.01                   | -0.21                            |
|                                |                                          | Pain               | -0.33                           | -0.15                         | 0.02                 | -0.07                            | -0.03                  | 0.03                   | 0.04                      | 0.03                    | 0.00                 | 0.02                    | -0.06                | -0.05                  | -0.03                            |
|                                |                                          | Anxiety/depression | -0.18                           | -0.13                         | -0.24                | -0.03                            | -0.05                  | -0.14                  | -0.13                     | -0.20                   | -0.18                | 0.03                    | -0.12                | -0.02                  | -0.18                            |

|                    |                                          |                    |       |       |       |       |       |       |       |       |       |       |       |       |       |
|--------------------|------------------------------------------|--------------------|-------|-------|-------|-------|-------|-------|-------|-------|-------|-------|-------|-------|-------|
| Validation dataset | Proxy-rated QoL-AD vs. Proxy-rated EQ-5D | Mobility           | -0.39 | -0.31 | -0.10 | -0.11 | -0.09 | -0.05 | 0.01  | -0.12 | -0.20 | -0.29 | -0.30 | -0.12 | -0.20 |
|                    |                                          | Self-care          | -0.29 | -0.29 | -0.14 | -0.11 | -0.08 | -0.10 | -0.09 | -0.21 | -0.27 | -0.43 | -0.35 | -0.16 | -0.30 |
|                    |                                          | Usual activities   | -0.31 | -0.44 | -0.30 | -0.16 | -0.27 | -0.14 | -0.16 | -0.24 | -0.41 | -0.56 | -0.42 | -0.23 | -0.43 |
|                    |                                          | Pain               | -0.51 | -0.33 | -0.18 | -0.06 | -0.10 | -0.02 | -0.05 | -0.13 | -0.20 | -0.17 | -0.25 | -0.09 | -0.23 |
|                    |                                          | Anxiety/depression | -0.19 | -0.25 | -0.58 | -0.17 | -0.23 | -0.19 | -0.27 | -0.22 | -0.40 | -0.18 | -0.30 | -0.19 | -0.42 |

Cells highlighted in green indicate strong correlations (absolute value of 0.30 or higher), and cells highlighted in red indicated correlations close to 0 (absolute value 0 to 0.10)

Supplemental Table 5a: Comparison of the main mapping algorithms (all scenarios)

| Model                    | Self-rated QoL-AD → Self-rated EQ-5D  |               |                                      |                                      |                            | Proxy-rated QoL-AD → Self-rated EQ-5D  |               |                                      |                                      |                            |
|--------------------------|---------------------------------------|---------------|--------------------------------------|--------------------------------------|----------------------------|----------------------------------------|---------------|--------------------------------------|--------------------------------------|----------------------------|
|                          | RMSE                                  | MAE           | Minimum predicted score <sup>1</sup> | Maximum predicted score <sup>1</sup> | Accuracy within 0.1 points | RMSE                                   | MAE           | Minimum predicted score <sup>1</sup> | Maximum predicted score <sup>1</sup> | Accuracy within 0.1 points |
| Direct OLS Continuous    | 0.1797                                | 0.1302        | 0.460                                | 1.000                                | 49%                        | 0.1937                                 | 0.1413        | 0.607                                | 1.000                                | 47%                        |
| Direct OLS Categorical   | 0.1614                                | 0.1196        | 0.249                                | 1.000                                | 51%                        | 0.1809                                 | 0.1297        | 0.494                                | 1.000                                | 50%                        |
| Direct Tobit             | 0.1612                                | 0.1191        | 0.233                                | 0.974                                | 52%                        | 0.1805                                 | 0.1291        | 0.484                                | 0.989                                | 50%                        |
| Direct Clad              | 0.1677                                | 0.1195        | 0.293                                | 1.000                                | 54%                        | 0.1947                                 | 0.1322        | 0.468                                | 1.000                                | 51%                        |
| Direct 2-part            | 0.1610                                | 0.1192        | 0.259                                | 0.982                                | 52%                        | 0.1802                                 | 0.1291        | 0.485                                | 0.995                                | 50%                        |
| Response OLS Categorical | 0.1765                                | 0.1267        | 0.378                                | 1.000                                | 49%                        | 0.1810                                 | 0.1308        | 0.548                                | 1.000                                | 44%                        |
| Response OLS Continuous  | 0.1913                                | 0.1386        | 0.533                                | 1.000                                | 45%                        | 0.1986                                 | 0.1461        | 0.573                                | 1.000                                | 41%                        |
| Response ologit          | 0.1624                                | 0.1196        | 0.210                                | 0.964                                | 51%                        | 0.2015                                 | 0.1495        | 0.429                                | 0.975                                | 50%                        |
| Response mlogit          | <b>0.1348</b>                         | <b>0.1063</b> | -0.253                               | 0.972                                | 53%                        | <b>0.1580</b>                          | <b>0.1207</b> | -0.165                               | 0.976                                | 50%                        |
| Model                    | Self-rated QoL-AD → Proxy-rated EQ-5D |               |                                      |                                      |                            | Proxy-rated QoL-AD → Proxy-rated EQ-5D |               |                                      |                                      |                            |
|                          | RMSE                                  | MAE           | Minimum predicted score <sup>2</sup> | Maximum predicted score <sup>2</sup> | Accuracy within 0.1 points | RMSE                                   | MAE           | Minimum predicted score <sup>2</sup> | Maximum predicted score <sup>2</sup> | Accuracy within 0.1 points |
| Direct OLS Continuous    | 0.2159                                | 0.1686        | 0.397                                | 0.844                                | 38%                        | 0.2109                                 | 0.1614        | 0.336                                | 1.000                                | 42%                        |
| Direct OLS Categorical   | 0.2008                                | 0.1563        | 0.224                                | 0.912                                | 41%                        | 0.1916                                 | 0.1473        | 0.233                                | 1.000                                | 44%                        |
| Direct Tobit             | 0.2007                                | 0.1562        | 0.217                                | 0.882                                | 42%                        | 0.1915                                 | 0.1471        | 0.229                                | 0.958                                | 45%                        |
| Direct Clad              | 0.2082                                | 0.1563        | 0.227                                | 1.000                                | 43%                        | 0.2012                                 | 0.1497        | 0.200                                | 1.000                                | 45%                        |
| Direct 2-part            | 0.2007                                | 0.1563        | 0.232                                | 0.907                                | 41%                        | 0.1913                                 | 0.1465        | 0.241                                | 0.986                                | 45%                        |
| Response OLS Categorical | 0.2111                                | 0.1666        | 0.377                                | 1.000                                | 38%                        | 0.2062                                 | 0.1555        | 0.378                                | 1.000                                | 42%                        |
| Response OLS Continuous  | 0.2171                                | 0.1705        | 0.325                                | 0.906                                | 37%                        | 0.2140                                 | 0.1633        | 0.393                                | 1.000                                | 40%                        |
| Response ologit          | 0.2018                                | 0.1583        | 0.216                                | 0.857                                | 39%                        | 0.1928                                 | 0.1491        | 0.172                                | 0.921                                | 43%                        |
| Response mlogit          | <b>0.1899</b>                         | <b>0.1503</b> | -0.076                               | 0.840                                | 43%                        | <b>0.1819</b>                          | <b>0.1401</b> | -0.051                               | 0.930                                | 47%                        |

The lowest root mean square error (RMSE) and mean absolute error (MAE) are highlighted in bold

<sup>1</sup>The observed minimum and maximum observed self-rated EQ-5D scores were -0.261 and 1, respectively

<sup>2</sup>The observed minimum and maximum observed proxy-rated EQ-5D scores were -0.307 and 1, respectively

Supplemental Table 5b: Comparison of the mapping algorithms (excluding QoL-AD question 7, not including age and sex)

| Model                    | Self-rated QoL-AD → Self-rated EQ-5D  |               |                                      |                                      |                            | Proxy-rated QoL-AD → Self-rated EQ-5D  |               |                                      |                                      |                            |
|--------------------------|---------------------------------------|---------------|--------------------------------------|--------------------------------------|----------------------------|----------------------------------------|---------------|--------------------------------------|--------------------------------------|----------------------------|
|                          | RMSE                                  | MAE           | Minimum predicted score <sup>1</sup> | Maximum predicted score <sup>1</sup> | Accuracy within 0.1 points | RMSE                                   | MAE           | Minimum predicted score <sup>1</sup> | Maximum predicted score <sup>1</sup> | Accuracy within 0.1 points |
| Direct OLS Continuous    | 0.1812                                | 0.1316        | 0.460                                | 1.000                                | 48%                        | 0.1956                                 | 0.1428        | 0.609                                | 0.988                                | 46%                        |
| Direct OLS Categorical   | 0.1625                                | 0.1209        | 0.266                                | 0.987                                | 50%                        | 0.1828                                 | 0.1314        | 0.488                                | 1.000                                | 49%                        |
| Direct Tobit             | 0.1622                                | 0.1203        | 0.251                                | 0.961                                | 51%                        | 0.1827                                 | 0.1309        | 0.481                                | 0.981                                | 50%                        |
| Direct Clad              | 0.1682                                | 0.1206        | 0.197                                | 1.000                                | 52%                        | 0.1956                                 | 0.1337        | 0.470                                | 1.000                                | 50%                        |
| Direct 2-part            | 0.1623                                | 0.1208        | 0.274                                | 0.969                                | 50%                        | 0.1827                                 | 0.1312        | 0.486                                | 0.983                                | 50%                        |
| Response OLS Categorical | 0.1801                                | 0.1309        | 0.409                                | 1.000                                | 46%                        | 0.1992                                 | 0.1480        | 0.548                                | 1.000                                | 43%                        |
| Response OLS Continuous  | 0.1945                                | 0.1426        | 0.533                                | 1.000                                | 42%                        | 0.2017                                 | 0.1515        | 0.573                                | 1.000                                | 40%                        |
| Response ologit          | 0.1635                                | 0.1208        | 0.229                                | 0.950                                | 50%                        | 0.1834                                 | 0.1326        | 0.429                                | 0.962                                | 49%                        |
| Response mlogit          | <b>0.1410</b>                         | <b>0.1103</b> | -0.219                               | 0.963                                | 51%                        | <b>0.1613</b>                          | <b>0.1233</b> | -0.144                               | 0.964                                | 49%                        |
|                          | Self-rated QoL-AD → Proxy-rated EQ-5D |               |                                      |                                      |                            | Proxy-rated QoL-AD → Proxy-rated EQ-5D |               |                                      |                                      |                            |
|                          | RMSE                                  | MAE           | Minimum predicted score <sup>2</sup> | Maximum predicted score <sup>2</sup> | Accuracy within 0.1 points | RMSE                                   | MAE           | Minimum predicted score <sup>2</sup> | Maximum predicted score <sup>2</sup> | Accuracy within 0.1 points |
| Direct OLS Continuous    | 0.2192                                | 0.1711        | 0.441                                | 0.788                                | 38%                        | 0.2145                                 | 0.1633        | 0.324                                | 0.968                                | 40%                        |
| Direct OLS Categorical   | 0.2038                                | 0.1591        | 0.245                                | 0.888                                | 40%                        | 0.1939                                 | 0.1487        | 0.241                                | 0.988                                | 44%                        |
| Direct Tobit             | 0.2037                                | 0.1589        | 0.241                                | 0.862                                | 40%                        | 0.1939                                 | 0.1486        | 0.238                                | 0.945                                | 44%                        |
| Direct Clad              | 0.2115                                | 0.1588        | 0.295                                | 0.983                                | 43%                        | 0.2026                                 | 0.1524        | 0.224                                | 1.000                                | 43%                        |
| Direct 2-part            | 0.2035                                | 0.1592        | 0.256                                | 0.883                                | 40%                        | 0.1935                                 | 0.1477        | 0.247                                | 0.987                                | 44%                        |
| Response OLS Categorical | 0.2140                                | 0.1692        | 0.377                                | 1.000                                | 37%                        | 0.2081                                 | 0.1573        | 0.378                                | 1.000                                | 41%                        |
| Response OLS Continuous  | 0.2201                                | 0.1742        | 0.409                                | 0.906                                | 35%                        | 0.2154                                 | 0.1650        | 0.393                                | 1.000                                | 39%                        |
| Response ologit          | 0.2049                                | 0.1604        | 0.236                                | 0.847                                | 39%                        | 0.1955                                 | 0.1506        | 0.193                                | 0.929                                | 44%                        |
| Response mlogit          | <b>0.1941</b>                         | <b>0.1535</b> | -0.023                               | 0.857                                | 41%                        | <b>0.1862</b>                          | <b>0.1423</b> | -0.047                               | 0.945                                | 47%                        |

The lowest root mean square error (RMSE) and mean absolute error (MAE) are highlighted in bold

<sup>1</sup>The observed minimum and maximum self-rated EQ-5D scores were -0.261 and 1, respectively

<sup>2</sup>The observed minimum and maximum proxy-rated EQ-5D scores were -0.307 and 1, respectively

Supplemental Table 5c: Comparison of the mapping algorithms (including QoL-AD item 7, age and sex)

| Model                    | Self-rated QoL-AD → Self-rated EQ-5D  |               |                                      |                                      |                            | Proxy-rated QoL-AD → Self-rated EQ-5D  |               |                                      |                                      |                            |
|--------------------------|---------------------------------------|---------------|--------------------------------------|--------------------------------------|----------------------------|----------------------------------------|---------------|--------------------------------------|--------------------------------------|----------------------------|
|                          | RMSE                                  | MAE           | Minimum predicted score <sup>1</sup> | Maximum predicted score <sup>1</sup> | Accuracy within 0.1 points | RMSE                                   | MAE           | Minimum predicted score <sup>1</sup> | Maximum predicted score <sup>1</sup> | Accuracy within 0.1 points |
| Direct OLS Continuous    | 0.1835                                | 0.1326        | 0.459                                | 1.000                                | 47%                        | 0.1948                                 | 0.1435        | 0.603                                | 1.000                                | 45%                        |
| Direct OLS Categorical   | 0.1625                                | 0.1197        | 0.263                                | 1.000                                | 51%                        | 0.1800                                 | 0.1301        | 0.447                                | 1.000                                | 49%                        |
| Direct Tobit             | 0.1620                                | 0.1191        | 0.241                                | 0.982                                | 51%                        | 0.1794                                 | 0.1295        | 0.426                                | 0.993                                | 50%                        |
| Direct Clad              | 0.1714                                | 0.1210        | 0.190                                | 1.000                                | 53%                        | 0.1934                                 | 0.1328        | 0.533                                | 1.000                                | 50%                        |
| Direct 2-part            | 0.1627                                | 0.1195        | 0.266                                | 0.989                                | 52%                        | 0.1790                                 | 0.1296        | 0.438                                | 1.000                                | 49%                        |
| Response OLS Categorical | 0.1815                                | 0.1299        | 0.333                                | 1.000                                | 47%                        | 0.1979                                 | 0.1449        | 0.533                                | 1.000                                | 44%                        |
| Response OLS Continuous  | 0.1928                                | 0.1400        | 0.533                                | 1.000                                | 45%                        | 0.1996                                 | 0.1474        | 0.567                                | 1.000                                | 43%                        |
| Response ologit          | 0.1636                                | 0.1192        | 0.184                                | 0.975                                | 52%                        | 0.1800                                 | 0.1307        | 0.352                                | 0.984                                | 49%                        |
| Response mlogit          | <b>0.1335</b>                         | <b>0.1050</b> | -0.259                               | 0.981                                | 54%                        | <b>0.1569</b>                          | <b>0.1194</b> | -0.179                               | 0.983                                | 50%                        |
| Model                    | Self-rated QoL-AD → Proxy-rated EQ-5D |               |                                      |                                      |                            | Proxy-rated QoL-AD → Proxy-rated EQ-5D |               |                                      |                                      |                            |
|                          | RMSE                                  | MAE           | Minimum predicted score <sup>2</sup> | Maximum predicted score <sup>2</sup> | Accuracy within 0.1 points | RMSE                                   | MAE           | Minimum predicted score <sup>2</sup> | Maximum predicted score <sup>2</sup> | Accuracy within 0.1 points |
| Direct OLS Continuous    | 0.2190                                | 0.1711        | 0.418                                | 0.843                                | 37%                        | 0.2135                                 | 0.1634        | 0.336                                | 1.000                                | 41%                        |
| Direct OLS Categorical   | 0.2011                                | 0.1573        | 0.218                                | 0.927                                | 40%                        | 0.1918                                 | 0.1475        | 0.266                                | 1.000                                | 44%                        |
| Direct Tobit             | 0.2009                                | 0.1572        | 0.206                                | 0.891                                | 40%                        | 0.1917                                 | 0.1472        | 0.255                                | 0.967                                | 45%                        |
| Direct Clad              | 0.2094                                | 0.1591        | 0.185                                | 1.000                                | 41%                        | 0.2004                                 | 0.1461        | 0.238                                | 1.000                                | 47%                        |
| Direct 2-part            | 0.2006                                | 0.1570        | 0.235                                | 0.932                                | 40%                        | 0.1910                                 | 0.1462        | 0.266                                | 0.994                                | 45%                        |
| Response OLS Categorical | 0.2123                                | 0.1681        | 0.350                                | 1.000                                | 38%                        | 0.2062                                 | 0.1548        | 0.211                                | 1.000                                | 42%                        |
| Response OLS Continuous  | 0.2181                                | 0.1711        | 0.409                                | 0.906                                | 38%                        | 0.2147                                 | 0.1644        | 0.393                                | 1.000                                | 40%                        |
| Response ologit          | 0.2020                                | 0.1591        | 0.159                                | 0.862                                | 39%                        | 0.1936                                 | 0.1497        | 0.181                                | 0.937                                | 44%                        |
| Response mlogit          | <b>0.1883</b>                         | <b>0.1493</b> | -0.107                               | 0.856                                | 43%                        | <b>0.1785</b>                          | <b>0.1372</b> | -0.196                               | 0.950                                | 48%                        |

The lowest root mean square error (RMSE) and mean absolute error (MAE) are highlighted in bold

<sup>1</sup>The observed minimum and maximum self-rated EQ-5D scores were -0.261 and 1, respectively

<sup>2</sup>The observed minimum and maximum self-rated EQ-5D scores were -0.307 and 1, respectively

**Supplemental Table 5d: Comparison of the mapping algorithms when the model selection is run in the validation dataset (excluding QoL-AD item 7, age and sex)**

| Model                           | Proxy-rated QoL-AD → Self-rated EQ-5D |               |                                      |                                      |                            | Proxy-rated QoL-AD → Proxy-rated EQ-5D |               |                                      |                                      |                            |
|---------------------------------|---------------------------------------|---------------|--------------------------------------|--------------------------------------|----------------------------|----------------------------------------|---------------|--------------------------------------|--------------------------------------|----------------------------|
|                                 | RMSE                                  | MAE           | Minimum predicted score <sup>1</sup> | Maximum predicted score <sup>1</sup> | Accuracy within 0.1 points | RMSE                                   | MAE           | Minimum predicted score <sup>2</sup> | Maximum predicted score <sup>2</sup> | Accuracy within 0.1 points |
| <b>Direct OLS Continuous</b>    | 0.1970                                | 0.1441        | 0.690                                | 1.000                                | 42%                        | 0.1774                                 | 0.1275        | 0.429                                | 1.000                                | 52%                        |
| <b>Direct OLS Categorical</b>   | 0.1741                                | 0.1276        | 0.342                                | 1.000                                | 51%                        | 0.1565                                 | 0.1117        | 0.191                                | 1.000                                | 59%                        |
| <b>Direct Tobit</b>             | 0.1743                                | 0.1257        | 0.319                                | 0.999                                | 53%                        | 0.1571                                 | 0.1132        | 0.184                                | 0.998                                | 59%                        |
| <b>Direct Clad</b>              | n/a                                   | n/a           | n/a                                  | n/a                                  | n/a                        | n/a                                    | n/a           | n/a                                  | n/a                                  | n/a                        |
| <b>Direct 2-part</b>            | 0.1747                                | 0.1260        | 0.298                                | 1.000                                | 52%                        | 0.1556                                 | 0.1108        | 0.224                                | 1.000                                | 59%                        |
| <b>Response OLS Categorical</b> | 0.1986                                | 0.1281        | 0.587                                | 1.000                                | 48%                        | 0.1722                                 | 0.1070        | 0.024                                | 1.000                                | 58%                        |
| <b>Response OLS Continuous</b>  | 0.2095                                | 0.1325        | 0.620                                | 1.000                                | 49%                        | 0.1792                                 | 0.1118        | 0.516                                | 1.000                                | 58%                        |
| <b>Response ologit</b>          | 0.1729                                | 0.1244        | 0.193                                | 0.999                                | 53%                        | 0.1556                                 | 0.1102        | 0.126                                | 1.000                                | 61%                        |
| <b>Response mlogit</b>          | <b>0.1428</b>                         | <b>0.1061</b> | 0.056                                | 0.999                                | 59%                        | <b>0.1391</b>                          | <b>0.0994</b> | -0.105                               | 1.000                                | 65%                        |

*The lowest root mean square error (RMSE) and mean absolute error (MAE) are highlighted in bold. The direct CLAD model was not performed for these smaller sample sizes due to convergence issues.*

<sup>1</sup>*The observed minimum and maximum self-rated EQ-5D scores were -0.041 and 1, respectively*

<sup>2</sup>*The observed minimum and maximum proxy-rated EQ-5D scores were -0.095 and 1, respectively*

When the mapping algorithm derived from the estimation dataset is applied to the validation dataset to estimate self-rated EQ-5D utilities from proxy-rated QoL-AD data, a RMSE of 0.2152 and a MAE of 0.1542 are obtained.

## Supplemental Figure 2a: Prediction accuracy of the mapping models using mlogit (continued from main manuscript)

For all plots: Scatter plots of predicted versus observed utilities are presented in the left-hand column. Darker markers on the graphs indicate overlapping data points. Observed utilities have been classed into quartiles in the right-hand column, and the means of these quartiles are shown on the x-axis. On the y-axis, the median, interquartile range (thicker, darker vertical lines) and 10<sup>th</sup> to 90<sup>th</sup> centiles (thinner, lighter vertical lines) of the predicted utilities are shown on the y-axis to represent the data distribution.

Estimation dataset: Proxy-rated QoL-AD mapped to self-rated EQ-5D

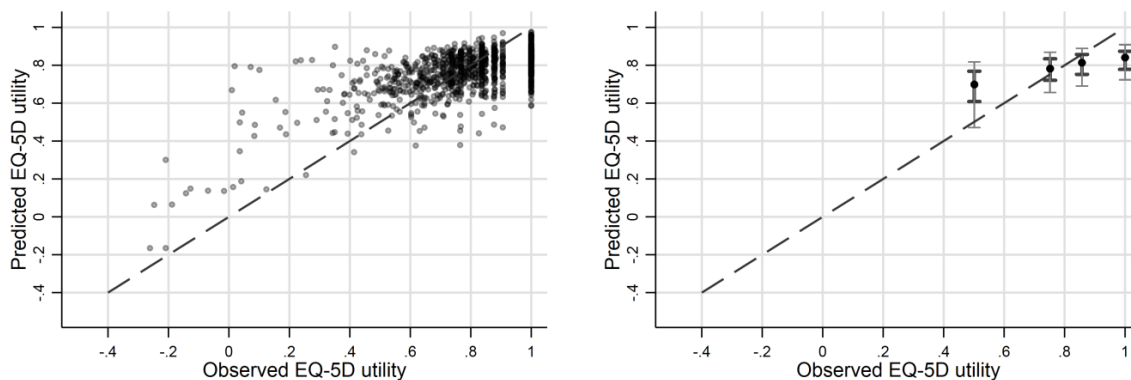

Estimation dataset: Self-rated QoL-AD mapped to proxy-rated EQ-5D

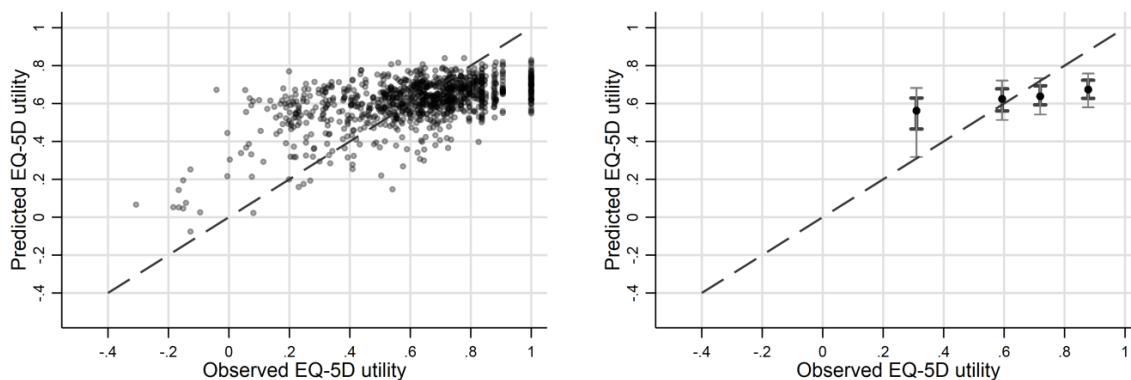

Validation dataset: Proxy-rated QoL-AD mapped to self-rated EQ-5D

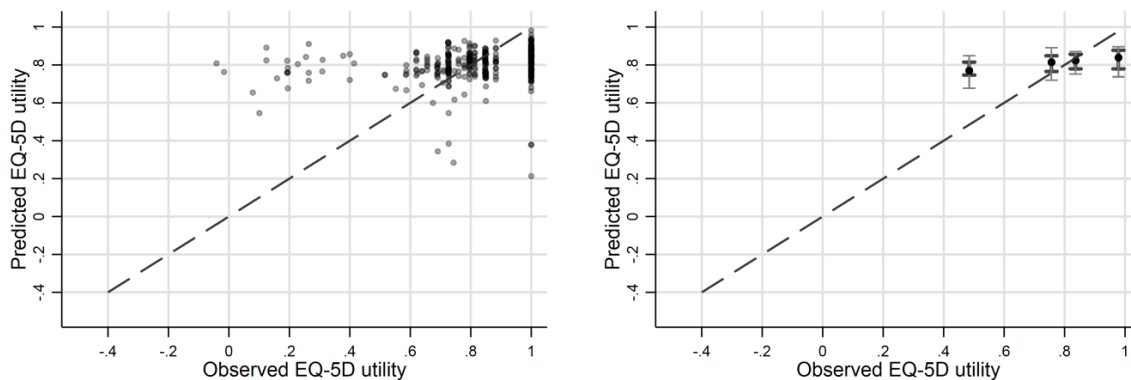

# Supplemental Figure 2b: Prediction accuracy of the mapping models using Tobit

Estimation dataset: Self-rated QoL-AD mapped to self-rated EQ-5D

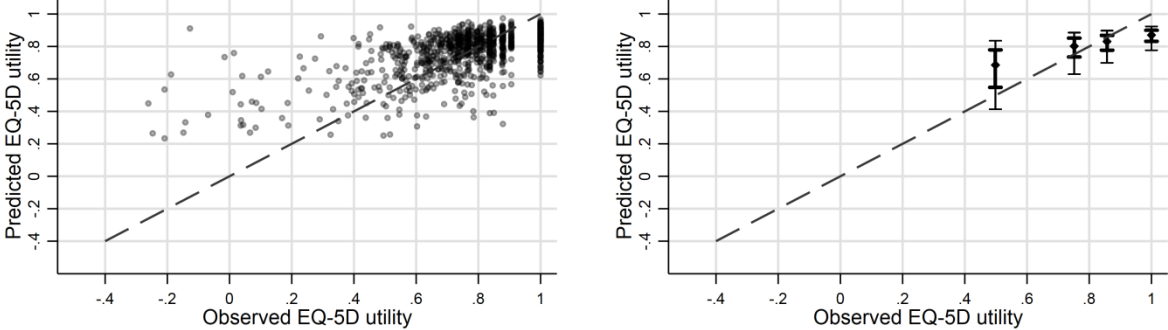

Estimation dataset: Proxy-rated QoL-AD mapped to proxy-rated EQ-5D

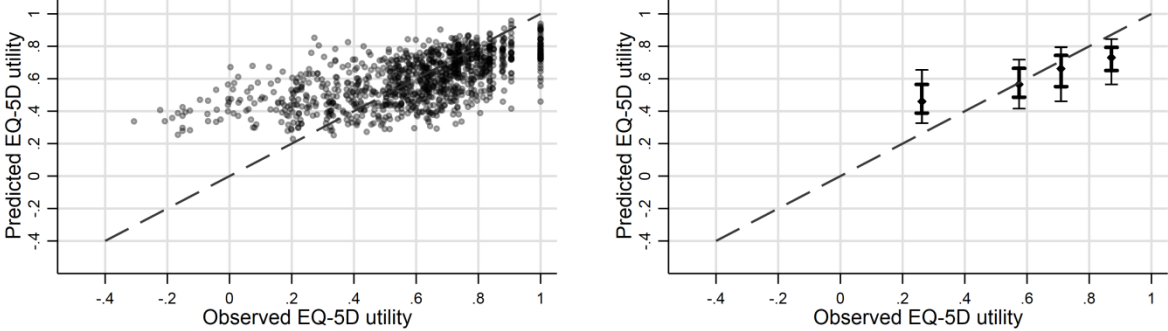

Validation dataset: Proxy-rated QoL-AD mapped to proxy-rated EQ-5D

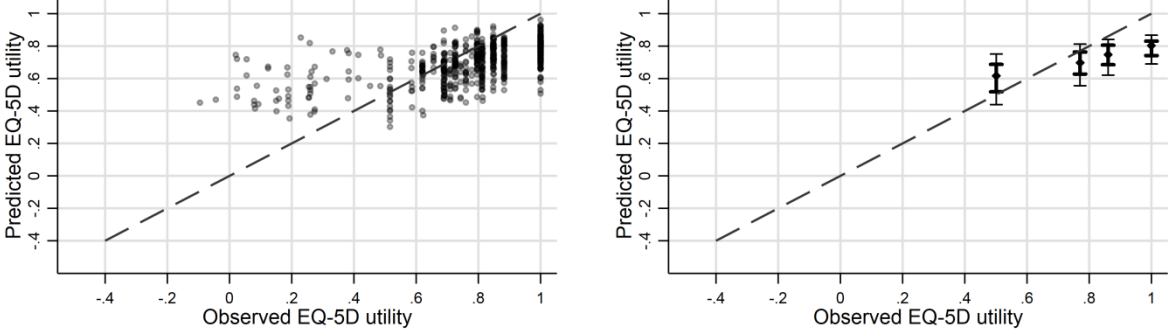



# Supplemental Figure 2c: Prediction accuracy of the mapping models using Tobit

Estimation dataset: Proxy-rated QoL-AD mapped to self-rated EQ-5D

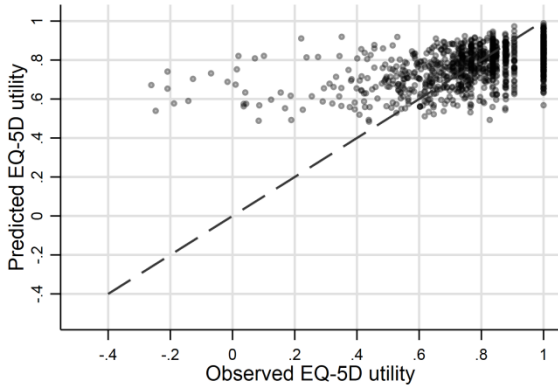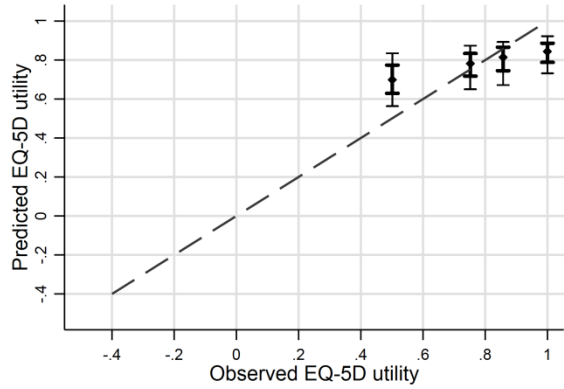

Estimation dataset: Self-rated QoL-AD mapped to proxy-rated EQ-5D

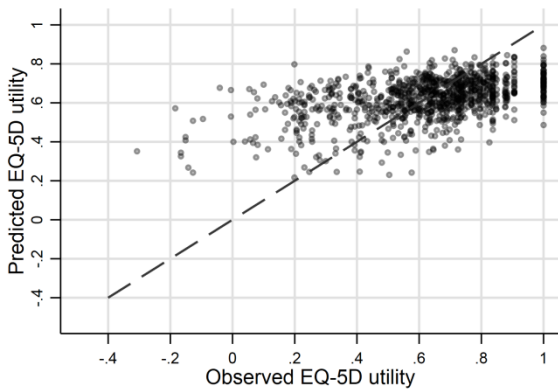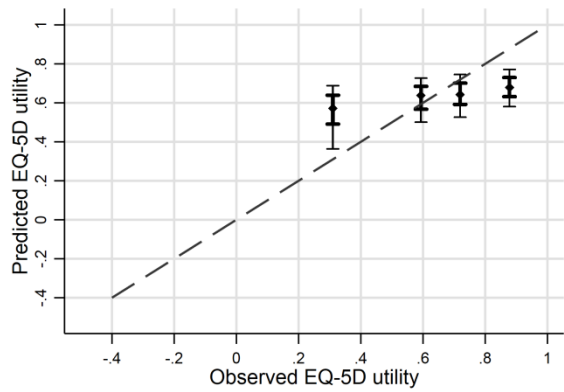

Validation dataset: Proxy-rated QoL-AD mapped to self-rated EQ-5D

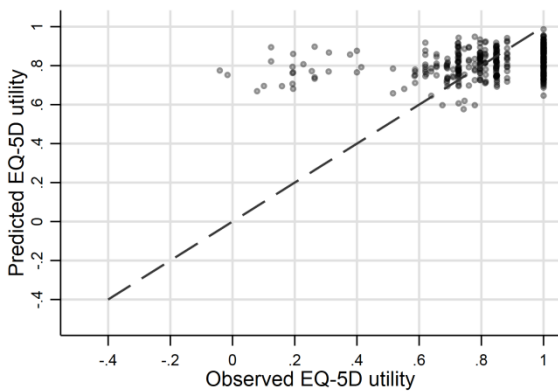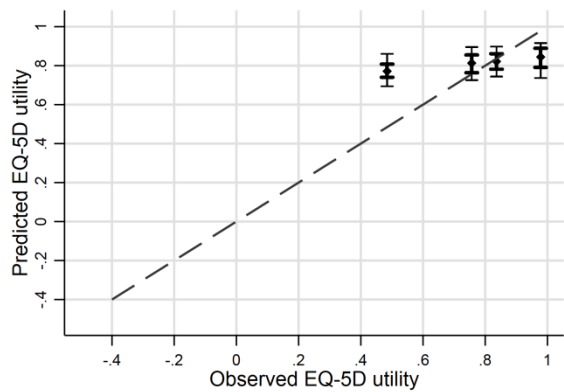

**Supplemental Table 6: Assessment of preferred mlogit model across different centiles of QoL-AD scores**

|                    |                                        |      | Observed QoL-AD falls into |        |                  |          |          |
|--------------------|----------------------------------------|------|----------------------------|--------|------------------|----------|----------|
|                    |                                        |      | Lowest quartile            | IQR    | Highest quartile | < median | ≥ median |
| Actifcare dataset  | Self-rated QoL-AD → Self-rated EQ-5D   | RMSE | 0.1570                     | 0.1336 | 0.1146           | 0.1470   | 0.1223   |
|                    |                                        | MAE  | 0.1213                     | 0.1072 | 0.0925           | 0.1153   | 0.0981   |
|                    | Proxy-rated QoL-AD → Self-rated EQ-5D  | RMSE | 0.1792                     | 0.1571 | 0.1250           | 0.1671   | 0.1493   |
|                    |                                        | MAE  | 0.1406                     | 0.1185 | 0.0984           | 0.1291   | 0.1133   |
|                    | Self-rated QoL-AD → Proxy-rated EQ-5D  | RMSE | 0.1925                     | 0.1895 | 0.1884           | 0.1895   | 0.1900   |
|                    |                                        | MAE  | 0.1516                     | 0.1481 | 0.1514           | 0.1487   | 0.1509   |
|                    | Proxy-rated QoL-AD → Proxy-rated EQ-5D | RMSE | 0.2101                     | 0.1772 | 0.1454           | 0.2002   | 0.1630   |
|                    |                                        | MAE  | 0.1657                     | 0.1366 | 0.1097           | 0.1581   | 0.1227   |
| Validation dataset | Proxy-rated QoL-AD → Self-rated EQ-5D  | RMSE | 0.2513                     | 0.1879 | 0.1810           | 0.2265   | 0.1799   |
|                    |                                        | MAE  | 0.1783                     | 0.1426 | 0.1311           | 0.1624   | 0.1195   |
|                    | Proxy-rated QoL-AD → Proxy-rated EQ-5D | RMSE | 0.2262                     | 0.2030 | 0.1592           | 0.2194   | 0.1739   |
|                    |                                        | MAE  | 0.1772                     | 0.1593 | 0.1330           | 0.1710   | 0.1417   |

**Supplemental Figure 3: Probability of predicting each response level for a given observed response to the EQ-5D-5L items**

**Supplemental Figure 3.1.1: Probability of predicting each response level for a given observed response to EQ-5D-5L item 1: self-rated QoL-AD mapped to self-rated EQ-5D-5L**

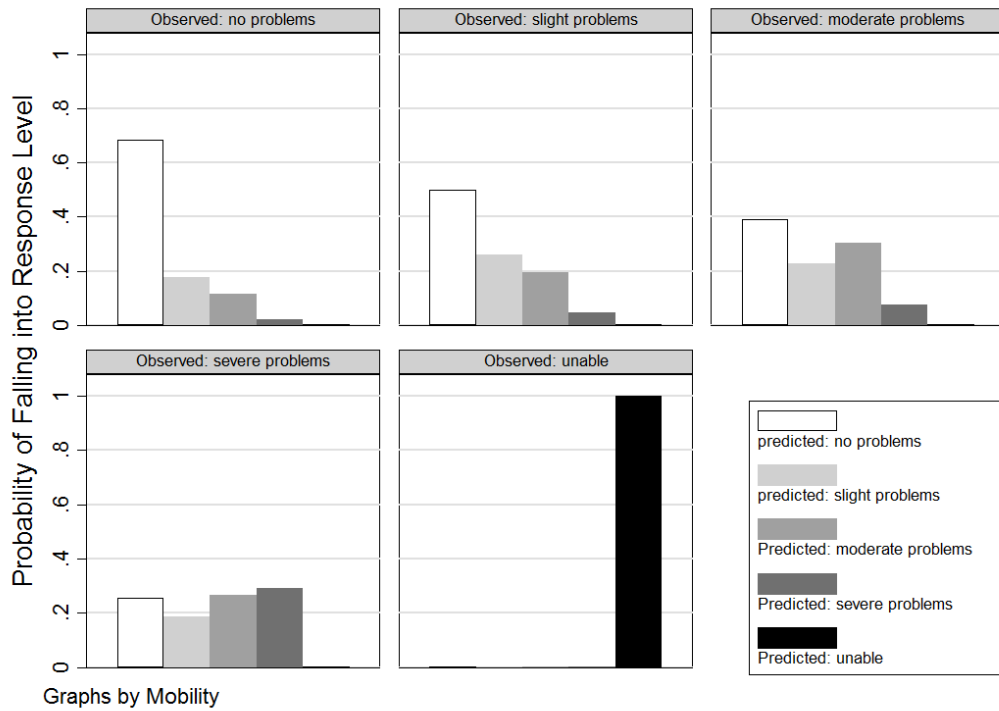

**Supplemental Figure 3.1.2: Probability of predicting each response level for a given observed response to EQ-5D-5L item 2 - self-rated QoL-AD mapped to self-rated EQ-5D-5L**

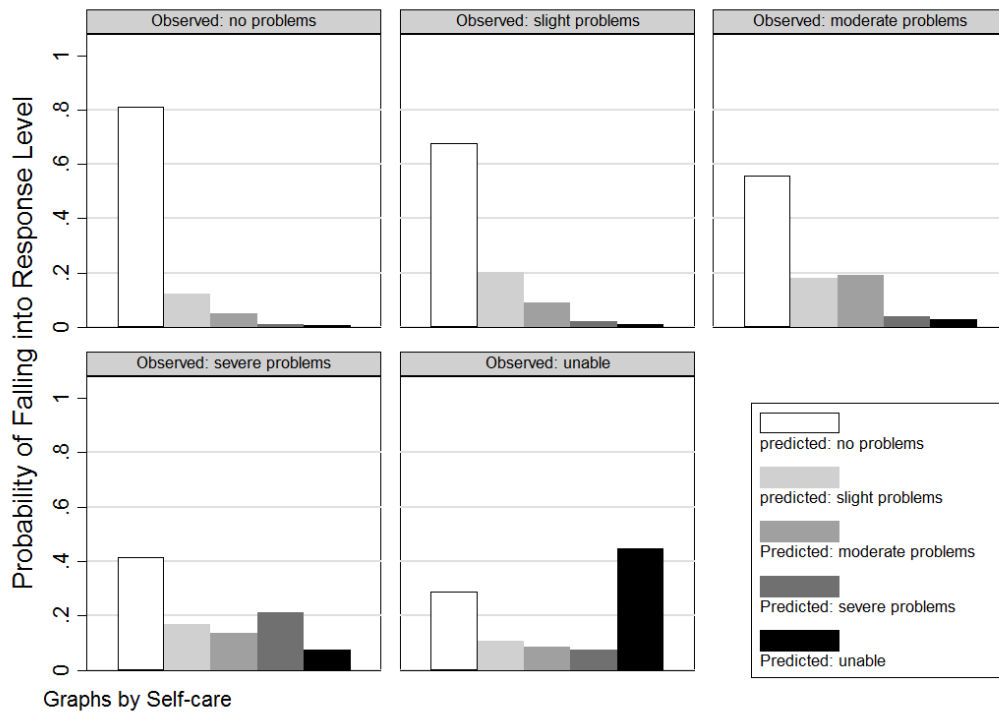

**Supplemental Figure 3.1.3: Probability of predicting each response level for a given observed response to EQ-5D-5L item 3 - self-rated QoL-AD mapped to self-rated EQ-5D-5L**

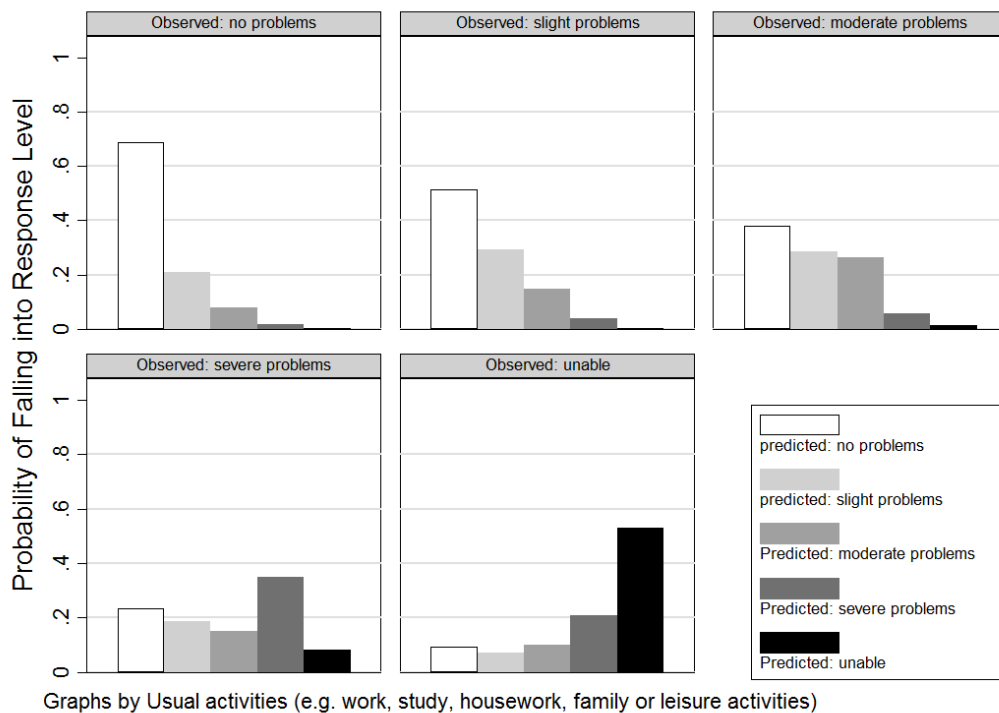

**Supplemental Figure 3.1.4: Probability of predicting each response level for a given observed response to EQ-5D-5L item 4 - self-rated QoL-AD mapped to self-rated EQ-5D-5L**

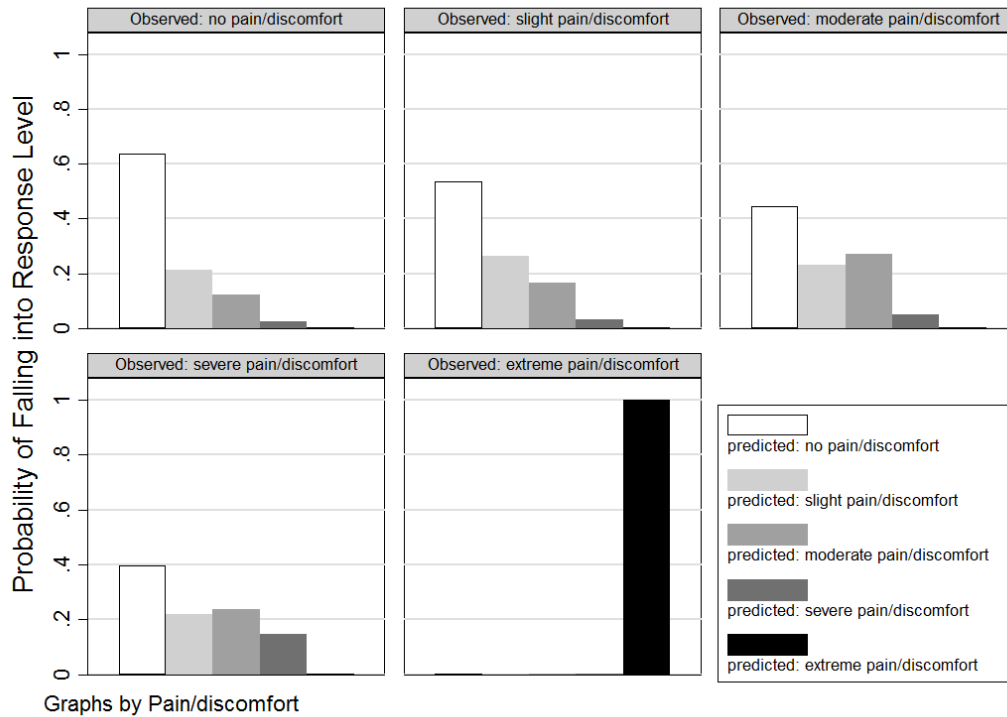

**Supplemental Figure 3.1.5: Probability of predicting each response level for a given observed response to EQ-5D-5L item 5 - self-rated QoL-AD mapped to self-rated EQ-5D-5L**

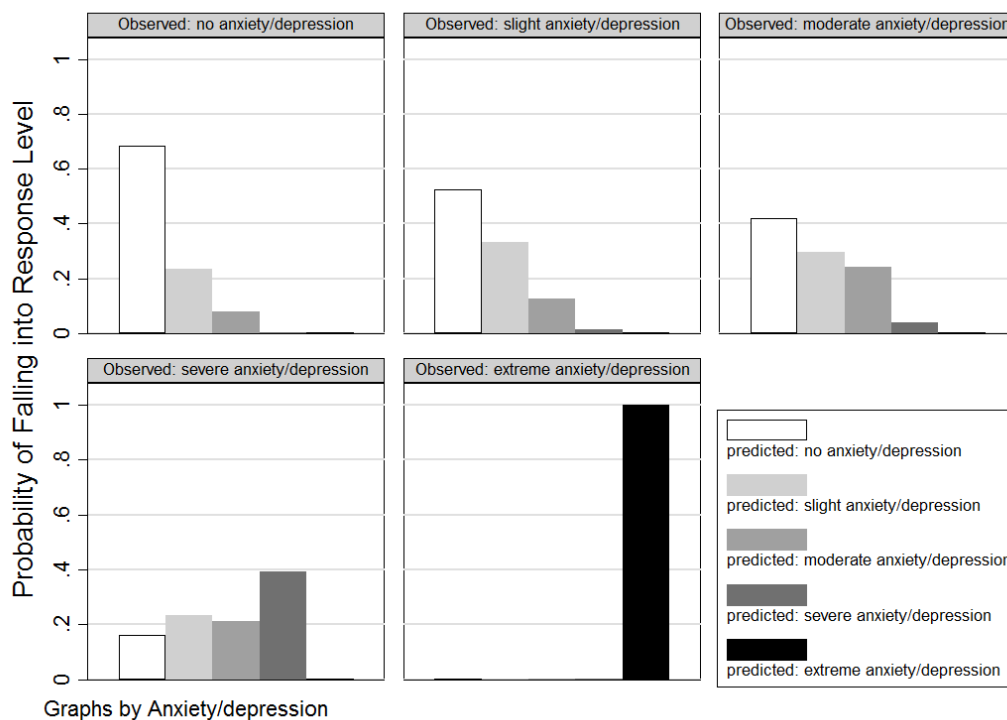

**Supplemental Figure 3.2.1: Probability of predicting each response level for a given observed response to EQ-5D-5L item 1 - proxy-rated QoL-AD mapped to self-rated EQ-5D-5L**

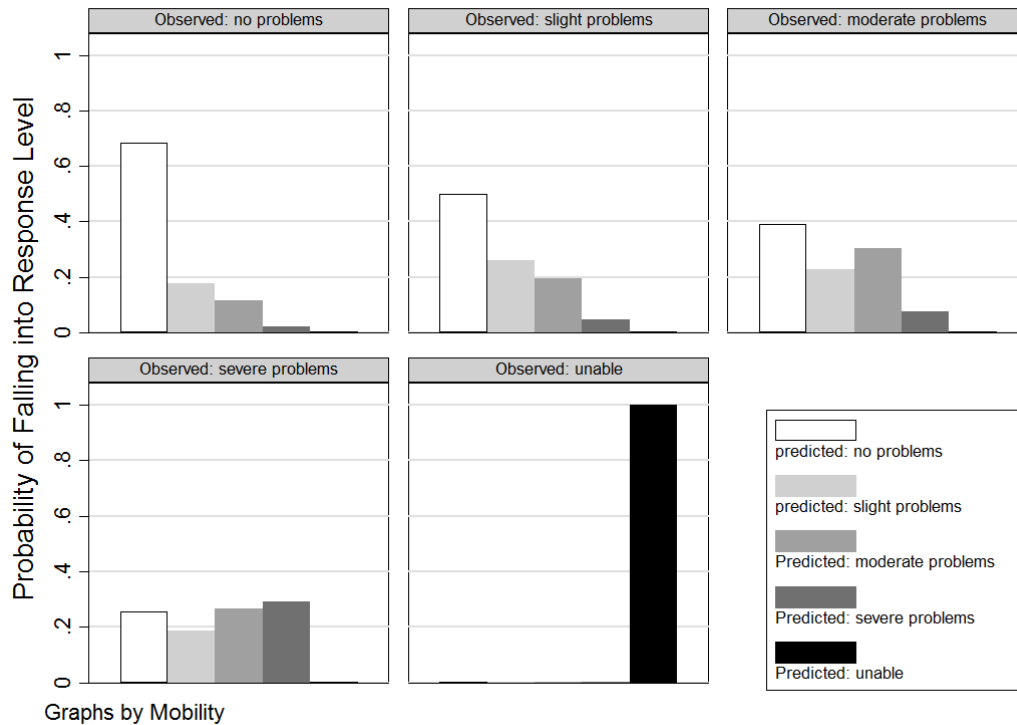

**Supplemental Figure 3.2.2: Probability of predicting each response level for a given observed response to EQ-5D-5L item 2 - proxy-rated QoL-AD mapped to self-rated EQ-5D-5L**

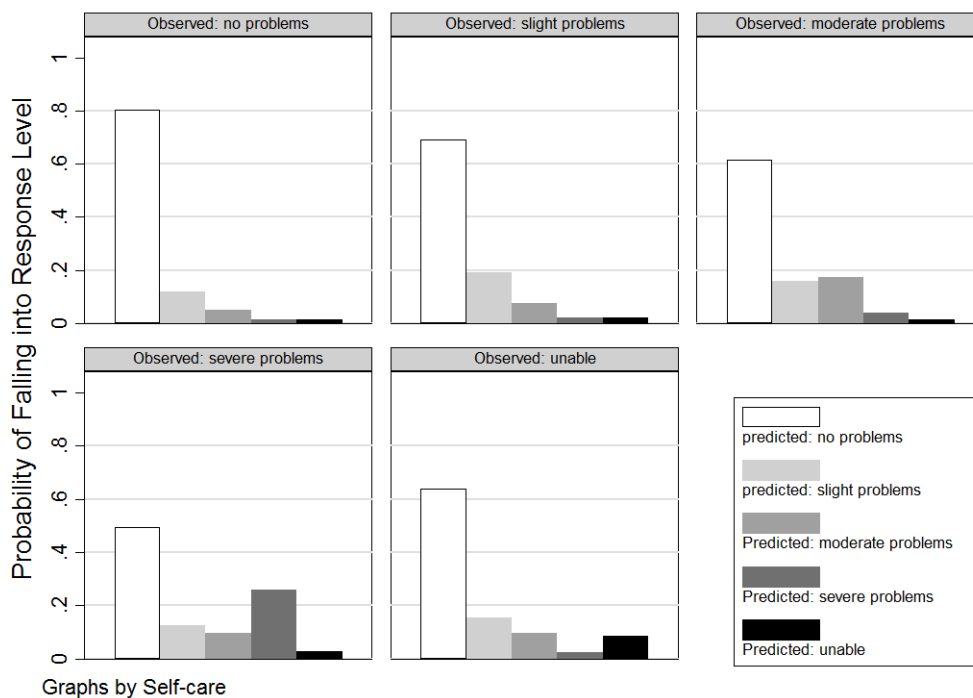

**Supplemental Figure 3.2.3: Probability of predicting each response level for a given observed response to EQ-5D-5L item 3 - proxy-rated QoL-AD mapped to self-rated EQ-5D-5L**

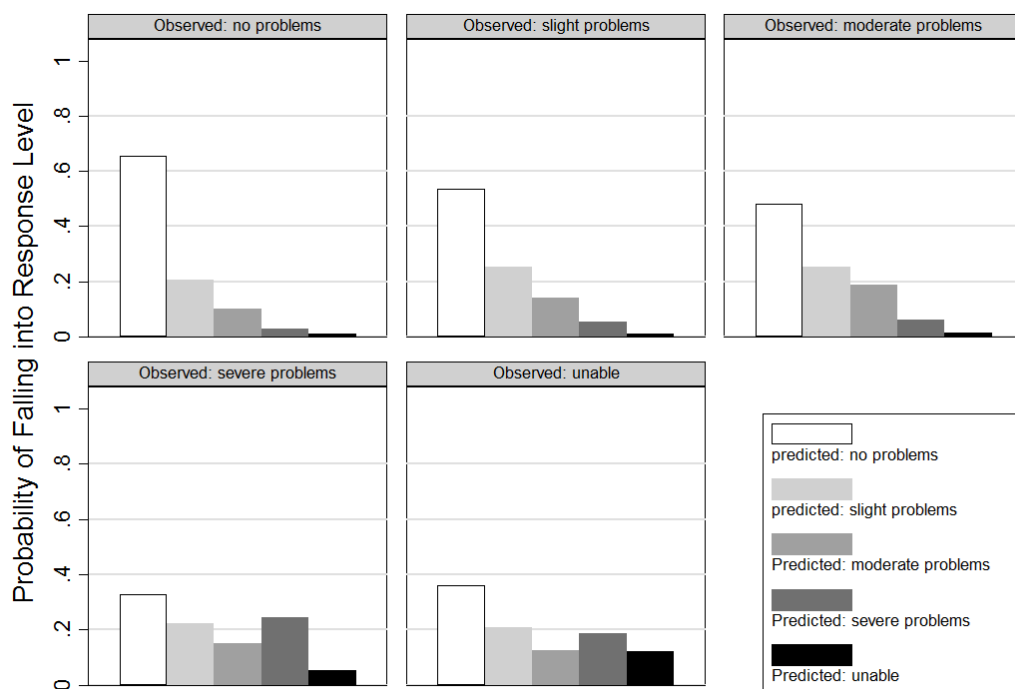

Graphs by Usual activities (e.g. work, study, housework, family or leisure activities)

**Supplemental Figure 3.2.4: Probability of predicting each response level for a given observed response to EQ-5D-5L item 4 - proxy-rated QoL-AD mapped to self-rated EQ-5D-5L**

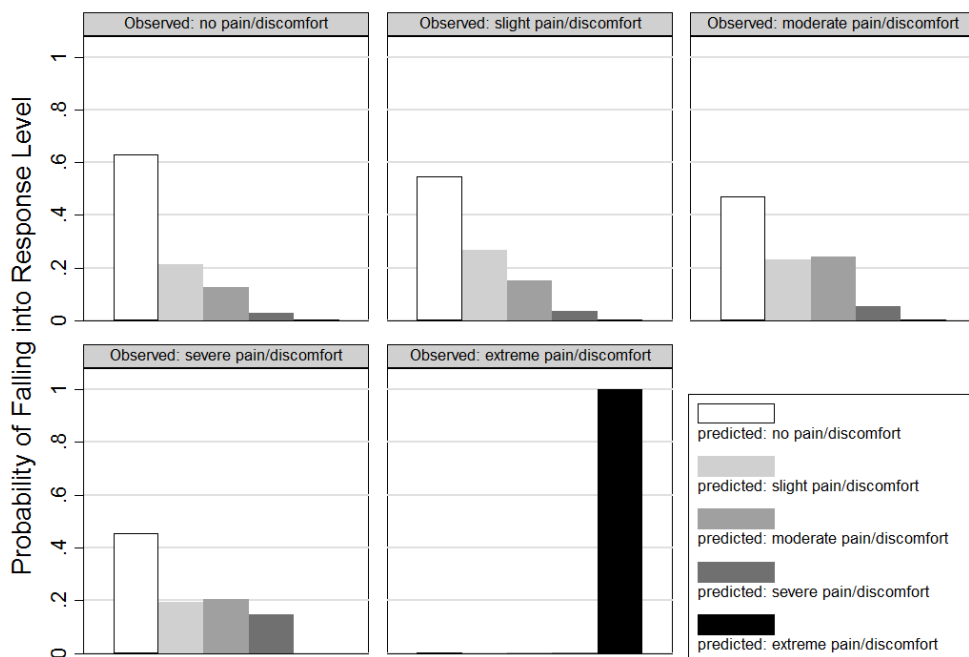

Graphs by Pain/discomfort

**Supplemental Figure 3.2.5: Probability of predicting each response level for a given observed response to EQ-5D-5L item 5 - proxy-rated QoL-AD mapped to self-rated EQ-5D-5L**

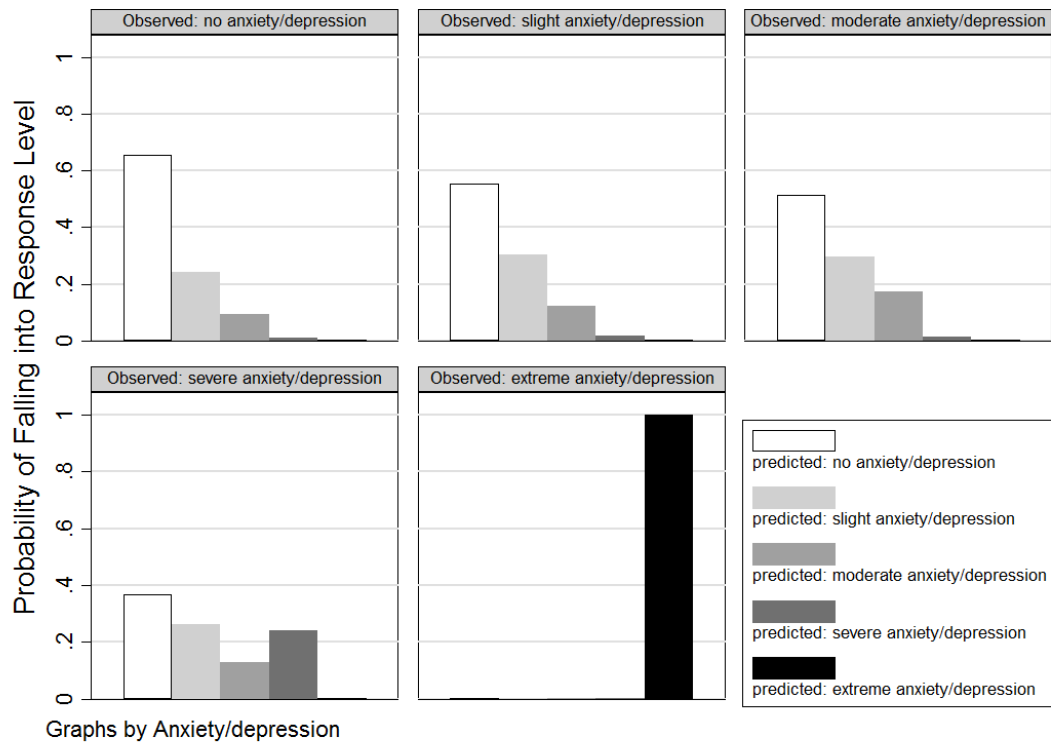



**Supplemental Figure 3.3.1: Probability of predicting each response level for a given observed response to EQ-5D-5L item 1 - self-rated QoL-AD mapped to proxy-rated EQ-5D-5L**

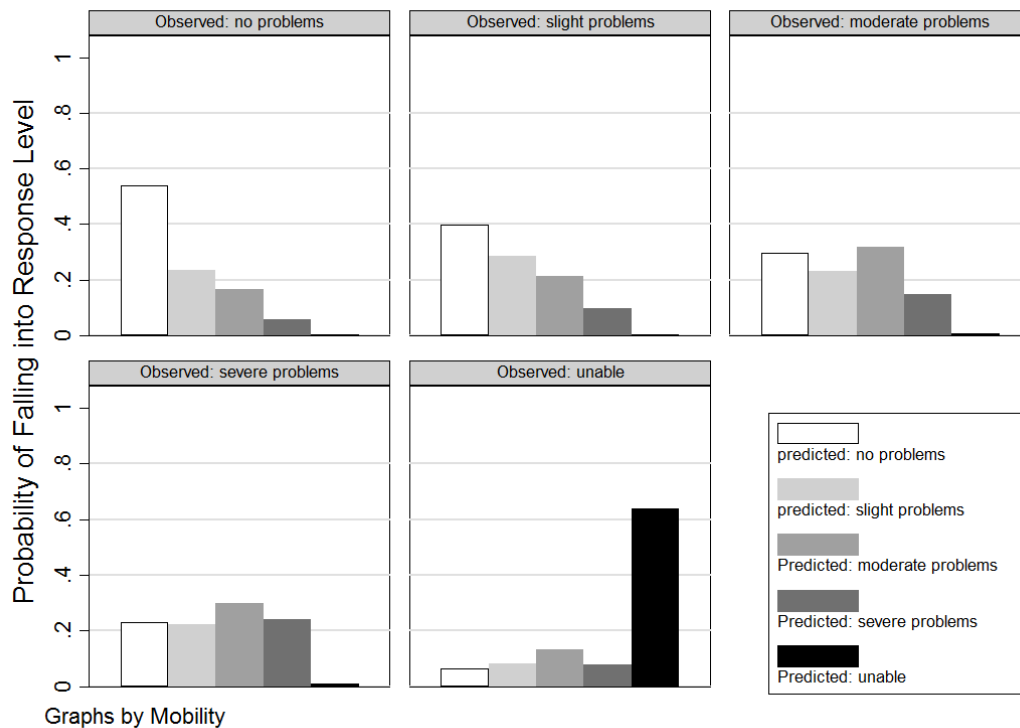

**Supplemental Figure 3.3.2: Probability of predicting each response level for a given observed response to EQ-5D-5L item 2 - self-rated QoL-AD mapped to proxy-rated EQ-5D-5L**

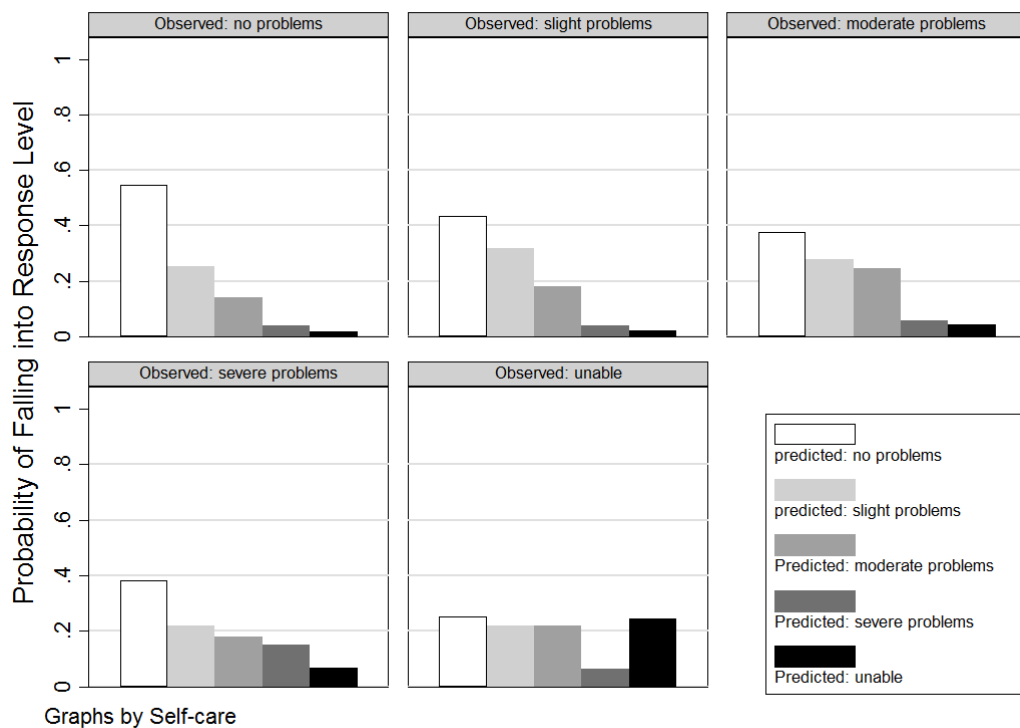

**Supplemental Figure 3.3.3: Probability of predicting each response level for a given observed response to EQ-5D-5L item 3 - self-rated QoL-AD mapped to proxy-rated EQ-5D-5L**

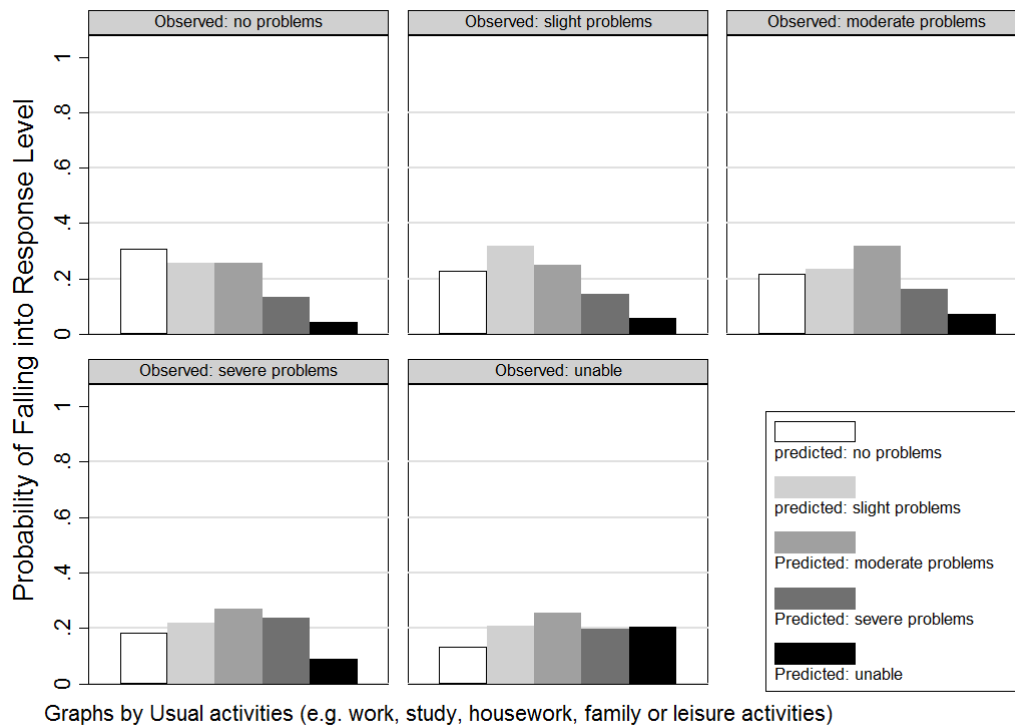

**Supplemental Figure 3.3.4: Probability of predicting each response level for a given observed response to EQ-5D-5L item 4 - self-rated QoL-AD mapped to proxy-rated EQ-5D-5L**

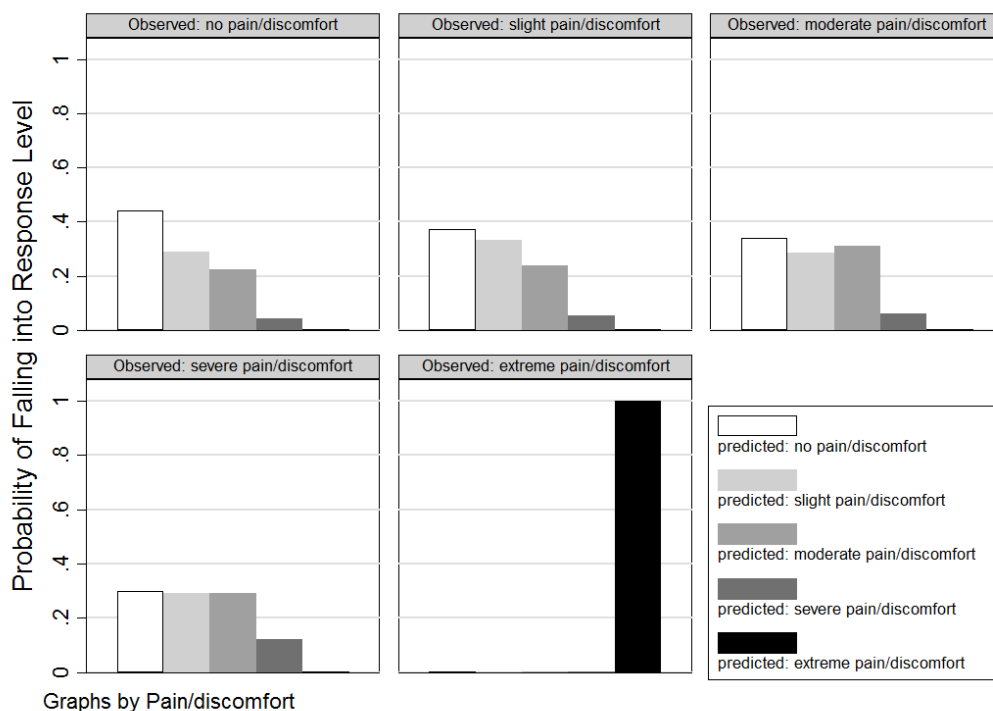

**Supplemental Figure 3.3.5: Probability of predicting each response level for a given observed response to EQ-5D-5L item 5 - self-rated QoL-AD mapped to proxy-rated EQ-5D-5L**

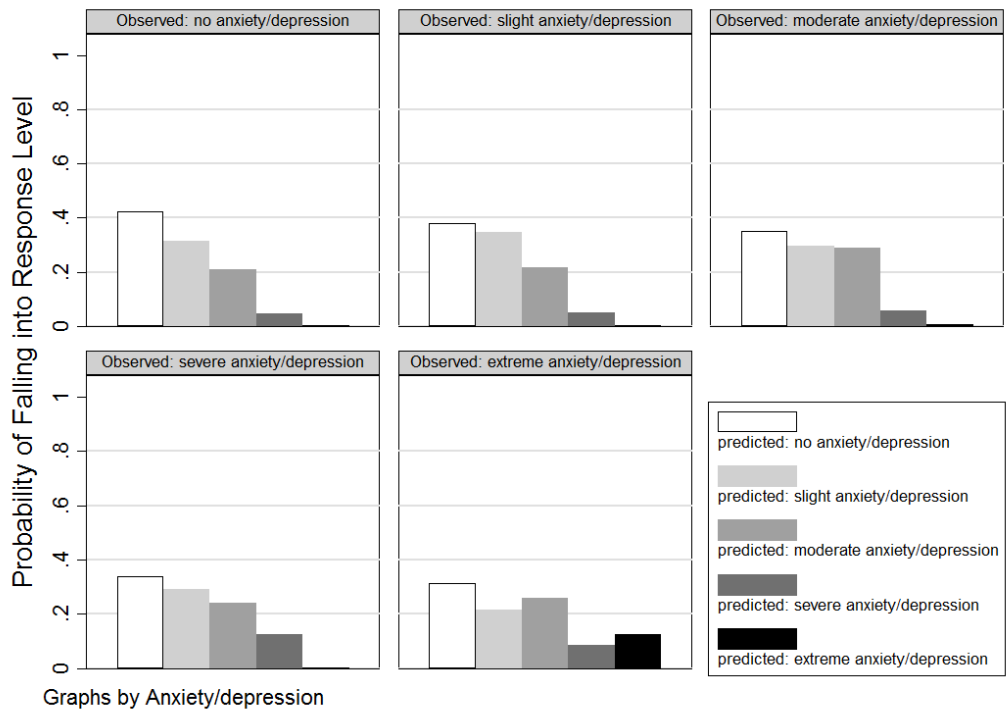

**Supplemental Figure 3.4.1: Probability of predicting each response level for a given observed response to EQ-5D-5L item 1 - proxy-rated QoL-AD mapped to proxy-rated EQ-5D-5L**

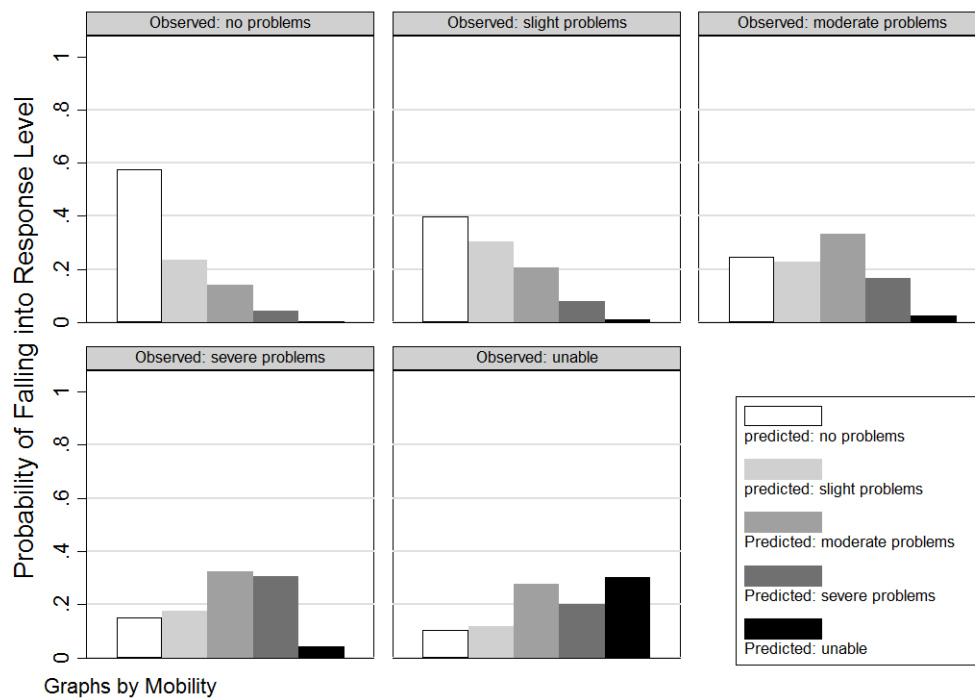

**Supplemental Figure 3.4.2: Probability of predicting each response level for a given observed response to EQ-5D-5L item 2 - proxy-rated QoL-AD mapped to proxy-rated EQ-5D-5L**

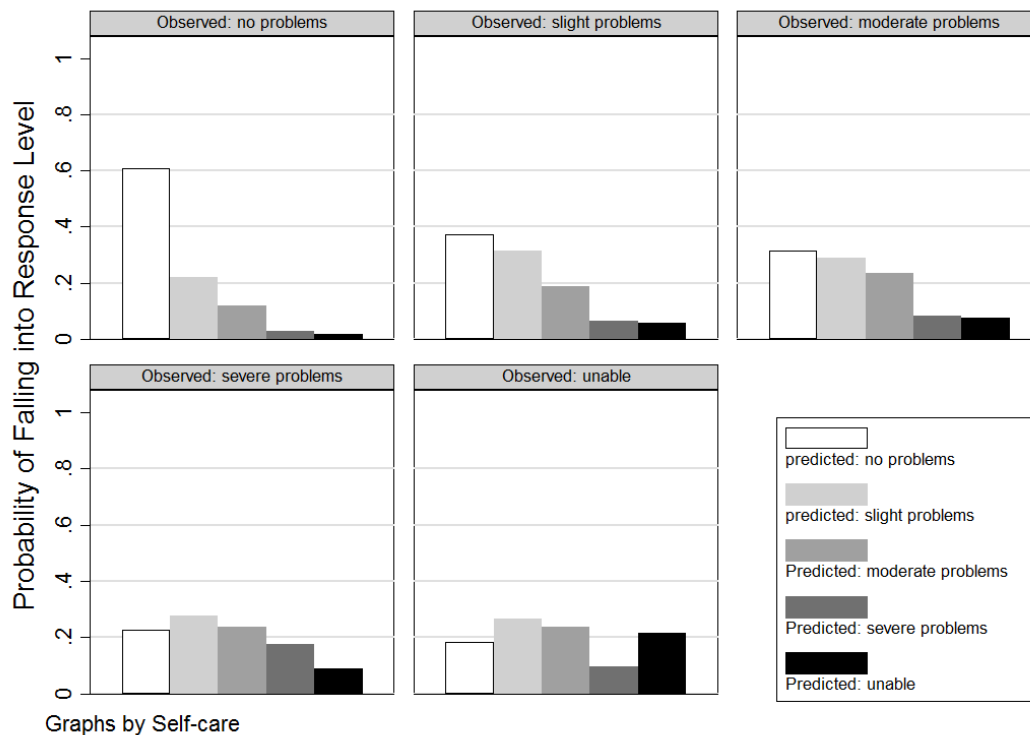

**Supplemental Figure 3.4.3: Probability of predicting each response level for a given observed response to EQ-5D-5L item 3 - proxy-rated QoL-AD mapped to proxy-rated EQ-5D-5L**

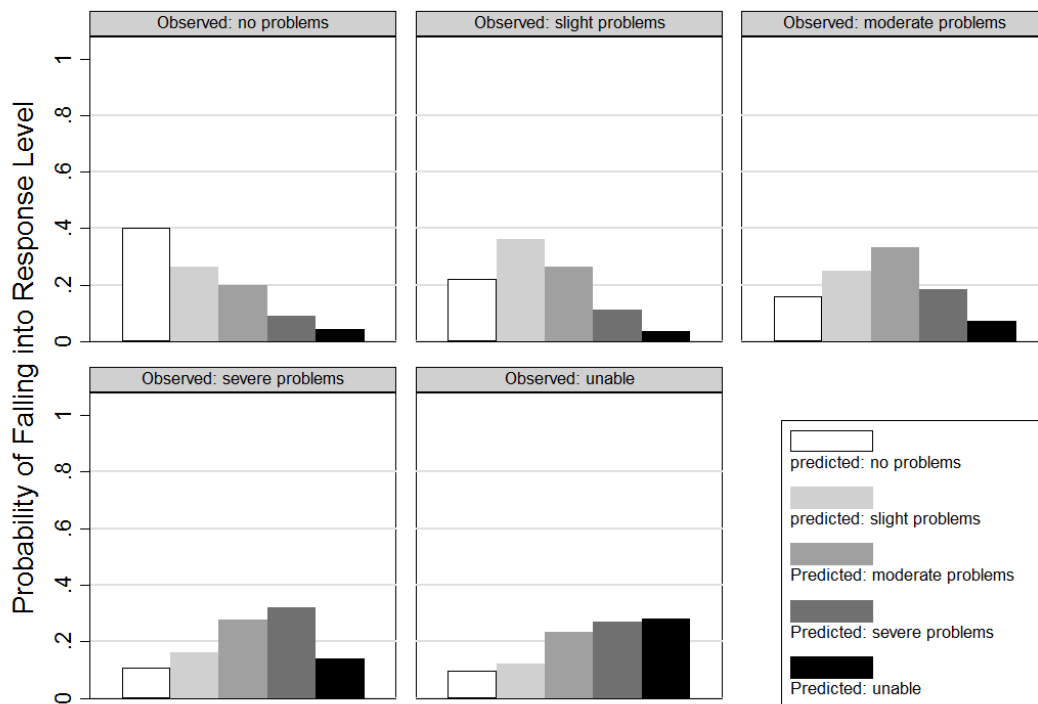

Graphs by Usual activities (e.g. work, study, housework, family or leisure activities)

**Supplemental Figure 3.4.4: Probability of predicting each response level for a given observed response to EQ-5D-5L item 4 - proxy-rated QoL-AD mapped to proxy-rated EQ-5D-5L**

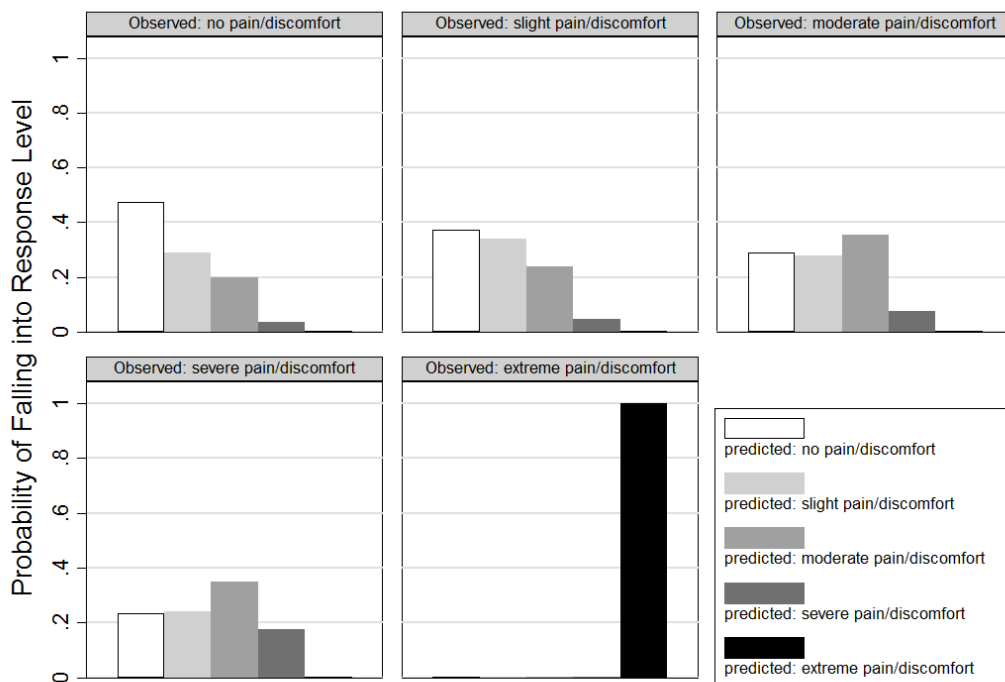

Graphs by Pain/discomfort

**Supplemental Figure 3.4.5: Probability of predicting each response level for a given observed response to EQ-5D-5L item 5 - proxy-rated QoL-AD mapped to proxy-rated EQ-5D-5L**

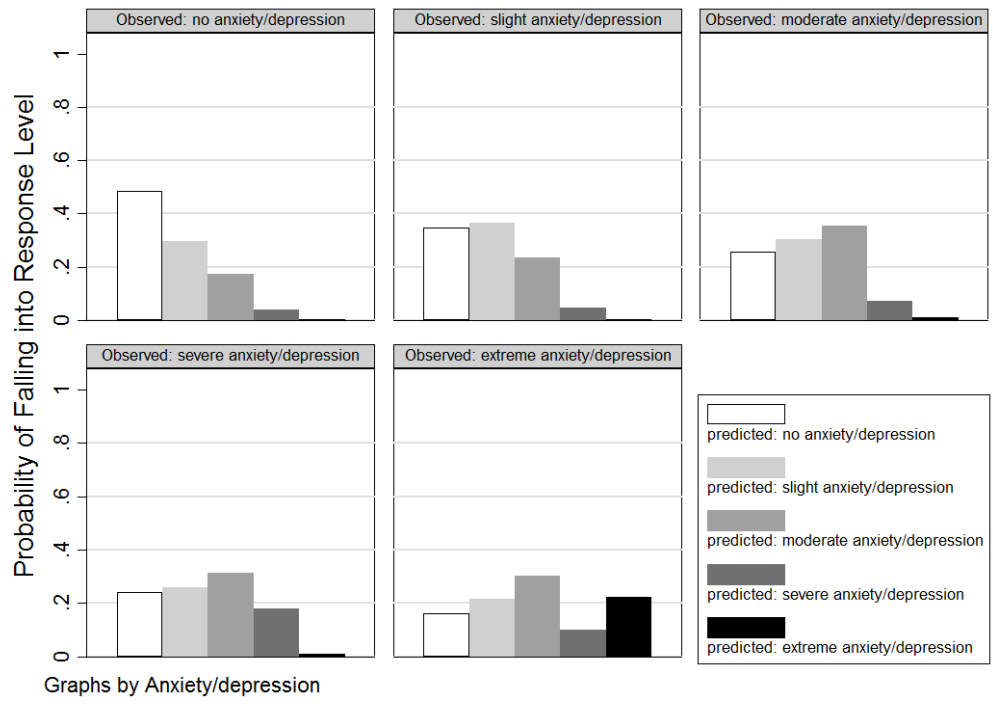

**Supplemental Table 7: Mean and range of predicted EQ-5D utilities for observed QoL-AD scores**

| Observed QoL-AD score* | Self-rated QoL-AD → Self-rated EQ-5D<br>Mean (min, max)<br>N** | Proxy-rated QoL-AD → Self-rated EQ-5D<br>Mean (min, max)<br>N** | Self-rated QoL-AD → Proxy-rated EQ-5D<br>Mean (min, max)<br>N** | Proxy-rated QoL-AD → Proxy-rated EQ-5D<br>Mean (min, max)<br>N** |
|------------------------|----------------------------------------------------------------|-----------------------------------------------------------------|-----------------------------------------------------------------|------------------------------------------------------------------|
| 16.3                   | 0.121<br>(0.008, 0.234)<br>N=2                                 | 0.678<br>(0.643, 0.707)<br>N=4                                  | 0.253<br>(0.078, 0.428)<br>N=2                                  | 0.365<br>(0.240, 0.516)<br>N=4                                   |
| 24.9                   | 0.632<br>(0.429, 0.780)<br>N=19                                | 0.730<br>(0.460, 0.900)<br>N=45                                 | 0.547<br>(0.299, 0.686)<br>N=19                                 | 0.514<br>(0.054, 0.7478)<br>N=50                                 |
| 30.3                   | 0.714<br>(0.357, 0.848)<br>N=51                                | 0.773<br>(0.520, 0.902)<br>N=56                                 | 0.607<br>(0.277, 0.742)<br>N=51                                 | 0.587<br>(0.214, 0.788)<br>N=59                                  |
| 32.5                   | 0.727<br>(0.098, 0.895)<br>N=54                                | 0.757<br>(0.138, 0.906)<br>N=54                                 | 0.122<br>(0.048, 0.731)<br>N=55                                 | 0.640<br>(0.213, 0.764)<br>N=57                                  |
| 40.0                   | 0.842<br>(0.451, 0.919)<br>N=63                                | 0.873<br>(0.785, 0.956)<br>N=23                                 | 0.636<br>(0.058, 0.821)<br>N=63                                 | 0.778<br>(0.594, 0.869)<br>N=24                                  |
| 45.5                   | 0.892<br>(0.820, 0.972)<br>N=14                                | 0.931<br>(0.891, 0.970)<br>N=2                                  | 0.741<br>(0.633, 0.840)<br>N=14                                 | 0.845<br>(0.820, 0.869)<br>N=2                                   |
| 52.0                   | 0.965<br>(0.961, 0.968)<br>N=2                                 | n/a                                                             | 0.822<br>(0.815, 0.830)<br>N=2                                  | n/a                                                              |

*This table shows the mean and ranges of the predicted EQ-5D utilities for selected observed QoL-AD scores. Ranges are given, as different combinations of answers to individual items on the QoL-AD can lead to the same overall QoL-AD score, but may nevertheless have different utility values. In fact, predicted utilities may also differ if identical answers to all QoL-AD items were observed, because the predicted utility is also dependent on age and sex. The selected observed QoL-AD scores are a representative range of observed scores.*

**Supplemental Figure 4: Range of predicted EQ-5D utilities for observed QoL-AD scores**

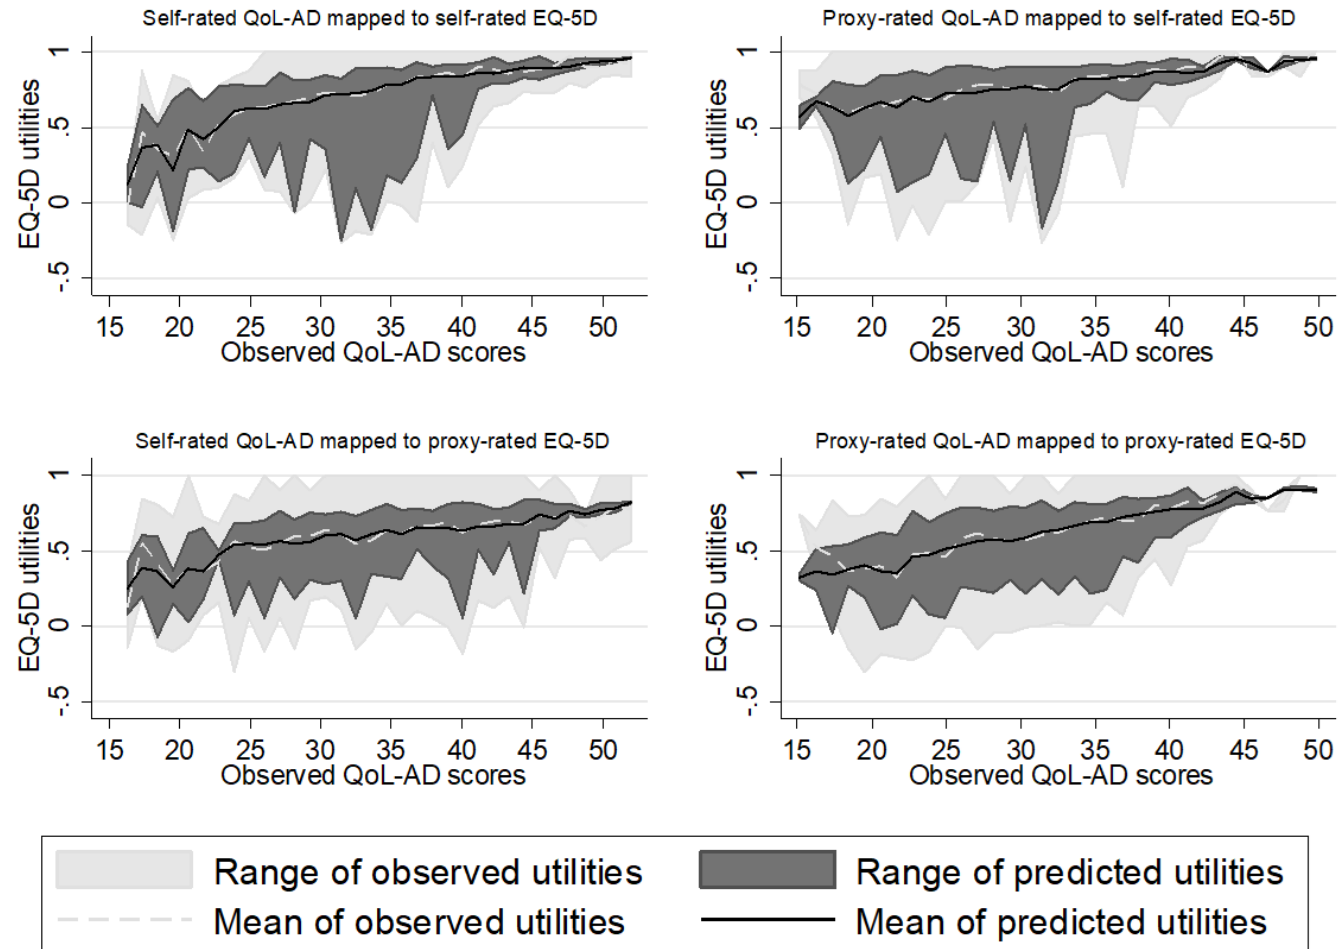



## Instructions for the Stata ado-file to map the QoL-AD to the EQ-5D-5L

This document describes how the **map\_qolad\_to\_eq5d5l** Stata ado file is used to obtain EQ-5D-5L utilities mapped from the Quality of Life Alzheimer's Disease Scale (QoL-AD), using either a response mapping approach based on an mlogit model, or a direct mapping approach, based on a Tobit model.

The downloadable material contains files containing the regression coefficients for the different mapping scenarios, as well as the Stata ado file.

These files need to be saved before the mapping program can be run, and Stata needs to be informed about the location of the ado file using the *sysdir set* command (i.e. *sysdir set personal "C:\StataAdoFiles"*).

### Command syntax

The syntax for the *map\_qolad\_to\_eq5d5l* command is as follows:

```
map_qolad_to_eq5d5l, qolad() sex() age() scenario() item7() model() coeffs()
```

Within the brackets, the following information needs to be specified:

|                 |                                                                                                                                                                                                                                                                                                                                                                                          |
|-----------------|------------------------------------------------------------------------------------------------------------------------------------------------------------------------------------------------------------------------------------------------------------------------------------------------------------------------------------------------------------------------------------------|
| <b>qolad</b>    | All 13 QoL-AD items need to be listed. If item 7 is not available the dataset, this variable needs to be created as a constant.<br>The items need to be listed in the correct order (i.e. starting with item 1, and proceeding in increasing order to item 13).<br>The QoL-AD data need to be coded as follows: 1=Poor, 2=Fair, 3=Good, 4=Excellent                                      |
| <b>sex</b>      | The variable specifying the gender of the person with dementia needs to be listed. This variable needs to be coded 1 for male and 0 for female.                                                                                                                                                                                                                                          |
| <b>age</b>      | The variable specifying the age of the person with dementia needs to be listed. For longitudinal data, this should be the age at the time the relevant data were collected.                                                                                                                                                                                                              |
| <b>scenario</b> | Specify which mapping scenario should be performed. Choose from:<br>'SelfEQ_SelfQOL' for mapping self-reported QoL-AD to self-reported EQ-5D<br>'ProxyEQ_ProxyQOL' for mapping proxy-reported QoL-AD to proxy-reported EQ-5D<br>'ProxyEQ_SelfQOL' for mapping self-reported QoL-AD to proxy-reported EQ-5D<br>'SelfEQ_ProxyQOL' for mapping proxy-reported QoL-AD to self-reported EQ-5D |
| <b>item7</b>    | Specify if the mapping should be performed excluding QoL-AD item 7 (use 'ExcludingItem7') or including QoL-AD item 7 (use 'IncludingItem7')                                                                                                                                                                                                                                              |
| <b>model</b>    | Specify mlogit or tobit                                                                                                                                                                                                                                                                                                                                                                  |
| <b>coeff</b>    | The location of the Stata data files containing the regression coefficients for the different mapping scenarios needs to be listed here. The file path needs to be entered without quotation marks.                                                                                                                                                                                      |
| <b>dataset</b>  | The location and name of the dataset in which the QoL-AD should be mapped to the EQ-5D needs to be specified. Please note that this program opens a new dataset and will close any datasets currently in use. Please ensure that all data are saved before the mapping <i>map_qolad_to_eq5d5l</i> program is run.                                                                        |

mlogit mapping:

The program generates 26 new variables. 25 of those estimate the probability that a participant will fall into each of the 5 levels for each of the 5 EQ-5D-5L items. Specifically, *mob\_p1* indicates the probability that the participant falls into the first level of the mobility item ("I have no problems in walking about"), and *pa\_p5* indicates the probability that a participant falls into the 5<sup>th</sup> level of the pain item (i.e. "I have extreme pain or discomfort"). 'mob', 'sc', 'ac', 'pa' and 'ad' are used to record information on the mobility, self-care, usual activities, pain/ discomfort and anxiety/ depression items respectively. 'p1' to 'p5' are used to indicate levels 1 ("no problems") to 5 ("unable to" or "extreme problems"). 'eq5d5l\_m' contains the EQ-5D-5D utility based on the UK value set (crosswalk to 3L value set, van Hout, 2012). Other country-specific value sets can be derived from the probabilities.

When the Tobit mapping algorithm is used, a single new variable (*eq5d5l\_t*), is created EQ-5D-5D utility based on the UK value set (crosswalk to 3L value set, van Hout, 2012).

Note: The mapping algorithm is currently available in Stata only. We would be very happy to cooperate with other researchers who wish to write code for implementation in SAS, R or other programs.
